# Supplementary material
Source: PubMed Central journal article supplement (PMC4757736)
Supplement: NIHMS65908-supplement-Supplementary_Tables.pdf [file NIHMS65908-supplement-Supplementary_Tables.pdf]

**Supplementary Table 1.** Differentially expressed genes after *Prdm1* inactivation. Gene expression in BM PCs from *Prdm1<sup>fl/gfp</sup>Cre<sup>ERT2</sup>* versus *Prdm1<sup>+/gfp</sup>Cre<sup>ERT2</sup>* mice as described in **Fig. 2**. The right column indicates if ChIPseq has revealed Blimp-1 binding site(s).

| Symbol        | EntrezID  | <i>Prdm1<sup>+/gfp</sup></i><br>expression | <i>Prdm1<sup>fl/gfp</sup></i><br>expression | Adjusted<br>P.Value | Blimp-1<br>bound |
|---------------|-----------|--------------------------------------------|---------------------------------------------|---------------------|------------------|
| Kynu          | 70789     | 0.3                                        | 22.7                                        | 3.76E-15            | x                |
| Id3           | 15903     | 1.0                                        | 34.3                                        | 2.11E-12            | x                |
| H2-Oa         | 15001     | 1.2                                        | 38.2                                        | 1.61E-11            |                  |
| Spib          | 272382    | 5.6                                        | 149.3                                       | 3.76E-15            | x                |
| Anxa8         | 11752     | 0.4                                        | 9.7                                         | 4.91E-08            |                  |
| Cxcr5         | 12145     | 0.5                                        | 11.1                                        | 3.56E-11            |                  |
| Tnni2         | 21953     | 0.9                                        | 18.7                                        | 4.54E-10            | x                |
| Nxpe2         | 78252     | 1.1                                        | 20.7                                        | 1.27E-11            |                  |
| Tm4sf5        | 75604     | 0.7                                        | 11.8                                        | 3.97E-09            |                  |
| Ccr7          | 12775     | 1.5                                        | 26.6                                        | 7.66E-11            | x                |
| B3gnt5        | 108105    | 0.6                                        | 10.6                                        | 3.56E-11            |                  |
| H2-DMb2       | 15000     | 6.6                                        | 109.5                                       | 1.17E-10            | x                |
| Nb1           | 17965     | 0.6                                        | 10.0                                        | 9.01E-10            |                  |
| Lib           | 16994     | 63.1                                       | 932.3                                       | 2.02E-13            | x                |
| Zbtb32        | 58206     | 0.9                                        | 13.0                                        | 4.76E-09            |                  |
| Rdh12         | 77974     | 5.3                                        | 69.4                                        | 3.36E-11            | x                |
| Snord35b      | 27212     | 4.7                                        | 58.6                                        | 2.07E-07            |                  |
| Plac8         | 231507    | 147.9                                      | 1740.3                                      | 2.44E-12            | x                |
| Upp1          | 22271     | 0.4                                        | 5.0                                         | 7.66E-06            |                  |
| Tlr9          | 81897     | 2.4                                        | 24.8                                        | 3.47E-10            | x                |
| Map3k15       | 270672    | 2.0                                        | 20.5                                        | 9.01E-10            |                  |
| Pigr          | 18703     | 1.9                                        | 19.8                                        | 1.24E-09            | x                |
| Klk1          | 16612     | 0.5                                        | 4.9                                         | 5.48E-06            |                  |
| Hhex          | 15242     | 1.8                                        | 18.0                                        | 1.29E-08            |                  |
| Tnfrsf8       | 21941     | 0.4                                        | 4.1                                         | 5.97E-06            |                  |
| H2-Aa         | 14960     | 691.6                                      | 6387.2                                      | 2.14E-11            | x                |
| Gm15848       | 100502856 | 2.5                                        | 22.5                                        | 4.13E-08            |                  |
| Nefl          | 17969     | 9.0                                        | 79.2                                        | 1.81E-10            | x                |
| Madcam1       | 17123     | 5.6                                        | 49.3                                        | 6.01E-09            |                  |
| Nqo1          | 18104     | 0.6                                        | 5.2                                         | 1.89E-06            |                  |
| Ly86          | 17084     | 34.1                                       | 273.1                                       | 3.64E-10            | x                |
| Gimap3        | 83408     | 11.5                                       | 90.1                                        | 9.01E-10            | x                |
| Faim3         | 69169     | 99.7                                       | 774.1                                       | 2.70E-10            |                  |
| Marcks1       | 17357     | 7.6                                        | 59.1                                        | 1.12E-08            |                  |
| Pstpip1       | 19200     | 4.5                                        | 31.8                                        | 4.90E-08            | x                |
| S1pr1         | 13609     | 3.6                                        | 24.1                                        | 7.40E-08            | x                |
| Dnase113      | 13421     | 7.2                                        | 48.5                                        | 4.76E-09            | x                |
| Fcer2a        | 14128     | 2.0                                        | 13.6                                        | 1.94E-07            |                  |
| Cd22          | 12483     | 3.8                                        | 25.0                                        | 8.82E-08            | x                |
| Cd72          | 12517     | 2.6                                        | 16.7                                        | 4.04E-05            |                  |
| Pdlim1        | 54132     | 3.8                                        | 23.8                                        | 1.03E-06            | x                |
| H2-Eb1        | 14969     | 408.1                                      | 2580.6                                      | 1.79E-09            | x                |
| Lilrb4        | 14728     | 3.5                                        | 21.4                                        | 7.95E-07            |                  |
| Gmfg          | 63986     | 5.1                                        | 30.1                                        | 1.03E-06            |                  |
| Tmem229b      | 268567    | 4.6                                        | 26.8                                        | 7.58E-08            | x                |
| Gm9835        | 100040018 | 24.2                                       | 138.6                                       | 1.55E-07            |                  |
| Pglyrp1       | 21946     | 52.5                                       | 296.1                                       | 6.84E-08            |                  |
| Nucb2         | 53322     | 34.4                                       | 194.1                                       | 3.87E-08            | x                |
| H2-Ob         | 15002     | 26.4                                       | 146.6                                       | 4.69E-08            |                  |
| Fcrl5         | 329693    | 2.0                                        | 11.3                                        | 3.34E-06            | x                |
| Anxa2         | 12306     | 28.5                                       | 157.0                                       | 9.20E-08            | x                |
| Il27ra        | 50931     | 2.6                                        | 13.7                                        | 1.78E-06            |                  |
| Parp8         | 52552     | 1.3                                        | 6.7                                         | 6.29E-06            | x                |
| Grap          | 71520     | 46.7                                       | 239.9                                       | 6.10E-08            | x                |
| Sle44a2       | 68682     | 5.8                                        | 29.6                                        | 3.59E-07            | x                |
| Klra2         | 16633     | 1.0                                        | 5.3                                         | 8.65E-04            |                  |
| S100a6        | 20200     | 9.0                                        | 45.3                                        | 5.48E-06            |                  |
| Fam3c         | 27999     | 15.9                                       | 79.6                                        | 1.43E-07            | x                |
| Sell          | 20343     | 26.3                                       | 130.8                                       | 1.36E-07            | x                |
| Susd3         | 66329     | 6.0                                        | 29.5                                        | 7.81E-06            | x                |
| Ecm1          | 13601     | 1.1                                        | 5.5                                         | 5.55E-05            |                  |
| Nekipsd       | 80987     | 1.0                                        | 4.7                                         | 4.95E-05            |                  |
| Tnfrsf9       | 21950     | 1.1                                        | 5.4                                         | 2.87E-04            |                  |
| Tnfaip8l2     | 69769     | 5.2                                        | 24.1                                        | 1.72E-05            | x                |
| Sirpb1a       | 320832    | 2.0                                        | 8.9                                         | 2.40E-03            |                  |
| 2310015A10Rik | 69548     | 1.2                                        | 5.3                                         | 1.98E-05            |                  |
| Cd80          | 12519     | 4.8                                        | 21.7                                        | 1.06E-05            | x                |

| Symbol        | EntrezID  | <i>Prdm1<sup>+/gfp</sup></i><br>expression | <i>Prdm1<sup>fl/gfp</sup></i><br>expression | Adjusted<br>P.Value | Blimp-1<br>bound |
|---------------|-----------|--------------------------------------------|---------------------------------------------|---------------------|------------------|
| Itgax         | 16411     | 2.2                                        | 10.1                                        | 5.97E-06            |                  |
| Napsa         | 16541     | 214.7                                      | 951.5                                       | 2.30E-07            | x                |
| Rpph1         | 85029     | 1.8                                        | 8.0                                         | 3.21E-03            |                  |
| H2-Ab1        | 14961     | 914.6                                      | 3966.8                                      | 3.56E-07            |                  |
| Ciita         | 12265     | 2.1                                        | 9.1                                         | 5.36E-06            | x                |
| Fam89a        | 69627     | 1.0                                        | 4.1                                         | 2.53E-03            |                  |
| Abca3         | 27410     | 9.9                                        | 42.3                                        | 3.08E-06            | x                |
| Scd1          | 20249     | 24.5                                       | 104.3                                       | 7.24E-07            | x                |
| Gng3          | 14704     | 1.2                                        | 4.9                                         | 1.34E-03            |                  |
| Ropn11        | 252967    | 1.8                                        | 7.6                                         | 1.08E-03            |                  |
| Lsp1          | 16985     | 141.3                                      | 591.7                                       | 5.41E-07            |                  |
| Aldh2         | 11669     | 34.0                                       | 141.5                                       | 1.12E-06            | x                |
| Tnfrsf26      | 244237    | 2.4                                        | 10.0                                        | 4.51E-05            | x                |
| Msi1          | 17690     | 1.0                                        | 4.2                                         | 8.62E-04            |                  |
| Fam43a        | 224093    | 1.2                                        | 4.8                                         | 1.83E-03            |                  |
| Fscn1         | 14086     | 16.7                                       | 67.0                                        | 5.36E-06            |                  |
| Sh3bgrl3      | 73723     | 186.8                                      | 741.6                                       | 6.55E-06            |                  |
| Rbm38         | 56190     | 9.4                                        | 37.2                                        | 1.57E-05            | x                |
| Aff3          | 16764     | 1.9                                        | 7.4                                         | 3.68E-05            |                  |
| Syt11         | 229521    | 1.3                                        | 5.1                                         | 1.01E-04            |                  |
| Cst7          | 13011     | 1.4                                        | 5.4                                         | 2.72E-03            |                  |
| Rcsd1         | 226594    | 9.8                                        | 37.3                                        | 1.36E-05            | x                |
| Gm15987       | 100504591 | 13.8                                       | 52.1                                        | 6.43E-05            |                  |
| Dek           | 110052    | 6.0                                        | 22.4                                        | 5.32E-05            | x                |
| Pded1lg2      | 58205     | 17.8                                       | 66.1                                        | 6.55E-06            |                  |
| Plaur         | 18793     | 1.5                                        | 5.6                                         | 6.46E-03            |                  |
| Fcgr4         | 246256    | 7.2                                        | 26.7                                        | 1.29E-04            | x                |
| Itgam         | 16409     | 7.0                                        | 26.0                                        | 1.72E-05            | x                |
| Sit1          | 54390     | 1.3                                        | 4.8                                         | 4.79E-03            |                  |
| Klrb1         | 100043861 | 4.8                                        | 17.1                                        | 1.70E-03            |                  |
| Cnr2          | 12802     | 1.3                                        | 4.5                                         | 4.92E-04            |                  |
| Cnn2          | 12798     | 40.2                                       | 139.8                                       | 2.19E-05            | x                |
| Vim           | 22352     | 57.9                                       | 200.1                                       | 1.91E-05            |                  |
| Cd300lf       | 246746    | 4.1                                        | 14.1                                        | 3.30E-04            | x                |
| Lacc1         | 210808    | 1.7                                        | 5.6                                         | 1.24E-03            |                  |
| Coro1a        | 12721     | 175.5                                      | 585.9                                       | 1.76E-05            |                  |
| Rn7sk         | 19817     | 2.6                                        | 8.5                                         | 3.38E-02            |                  |
| Cyb561a3      | 225912    | 187.7                                      | 620.3                                       | 1.49E-05            |                  |
| Cd40          | 21939     | 11.8                                       | 38.7                                        | 1.93E-04            |                  |
| Kctd14        | 233529    | 9.4                                        | 30.7                                        | 1.24E-04            |                  |
| Ddah2         | 51793     | 2.1                                        | 7.0                                         | 6.29E-03            |                  |
| Immp2l        | 93757     | 11.7                                       | 38.0                                        | 4.46E-04            | x                |
| H2-DMa        | 14998     | 74.1                                       | 239.5                                       | 9.61E-05            | x                |
| Procr         | 19124     | 14.5                                       | 47.0                                        | 1.78E-04            |                  |
| Naaa          | 67111     | 6.1                                        | 19.9                                        | 2.79E-04            |                  |
| Noxred1       | 71275     | 3.4                                        | 10.9                                        | 1.95E-03            |                  |
| Bcl2a1d       | 12047     | 3.1                                        | 9.8                                         | 1.78E-02            |                  |
| BC061194      | 381350    | 8.9                                        | 27.5                                        | 4.28E-04            |                  |
| Ctsh          | 13036     | 125.9                                      | 390.0                                       | 7.69E-05            | x                |
| Gpcl          | 14733     | 3.8                                        | 11.7                                        | 7.31E-04            |                  |
| Adamtsl4      | 229595    | 7.1                                        | 21.6                                        | 2.23E-04            | x                |
| Il4ra         | 16190     | 2.2                                        | 6.8                                         | 9.66E-04            |                  |
| Phf11a        | 219131    | 1.3                                        | 4.1                                         | 1.77E-02            |                  |
| Arhgap4       | 171207    | 6.0                                        | 18.3                                        | 3.70E-04            | x                |
| Trim34a       | 94094     | 3.6                                        | 10.9                                        | 1.00E-03            |                  |
| Btla          | 208154    | 62.1                                       | 188.4                                       | 5.82E-05            | x                |
| Arhgef18      | 102098    | 2.4                                        | 7.2                                         | 7.80E-04            |                  |
| Fah           | 14085     | 9.3                                        | 28.1                                        | 5.67E-03            |                  |
| Gns           | 75612     | 33.3                                       | 100.3                                       | 9.70E-05            | x                |
| Gm2830        | 100040543 | 6.1                                        | 18.4                                        | 1.10E-02            |                  |
| Il10ra        | 16154     | 7.2                                        | 21.5                                        | 6.75E-04            | x                |
| S100a10       | 20194     | 111.9                                      | 334.7                                       | 5.08E-04            |                  |
| Sspn          | 16651     | 2.6                                        | 7.9                                         | 1.62E-03            |                  |
| 1700021K19Rik | 100502698 | 7.5                                        | 22.3                                        | 2.66E-04            | x                |
| Klhl6         | 239743    | 6.8                                        | 20.2                                        | 8.68E-04            | x                |
| Cacng6        | 54378     | 2.9                                        | 8.6                                         | 1.38E-02            |                  |
| S1pr4         | 13611     | 12.8                                       | 37.9                                        | 6.65E-04            |                  |
| Hs3st1        | 15476     | 1.6                                        | 4.8                                         | 2.34E-02            |                  |
| Il1b          | 16176     | 1.8                                        | 5.3                                         | 1.78E-02            |                  |
| Gimap7        | 231932    | 35.0                                       | 103.5                                       | 3.83E-04            | x                |
| Pomgnt2       | 215494    | 2.9                                        | 8.5                                         | 1.95E-03            |                  |
| Yap1          | 22601     | 2.5                                        | 7.3                                         | 1.67E-03            |                  |
| Nuak2         | 74137     | 2.5                                        | 7.1                                         | 2.19E-03            | x                |
| Siglecg       | 243958    | 10.3                                       | 29.6                                        | 5.38E-04            |                  |
| Mta3          | 116871    | 6.7                                        | 19.2                                        | 7.11E-04            | x                |
| Gpr137b       | 83924     | 3.0                                        | 8.5                                         | 2.41E-03            |                  |
| Soes1         | 12703     | 5.8                                        | 16.4                                        | 3.96E-03            | x                |

| Symbol        | EntrezID  | <i>Prdm1</i> <sup>+/gfp</sup><br>expression | <i>Prdm1</i> <sup>fl/gfp</sup><br>expression | Adjusted<br>P.Value | Blimp-1<br>bound |
|---------------|-----------|---------------------------------------------|----------------------------------------------|---------------------|------------------|
| BC021614      | 225884    | 1.9                                         | 5.4                                          | 4.11E-02            |                  |
| Tmem243       | 652925    | 17.2                                        | 49.1                                         | 2.43E-03            |                  |
| Gimap4        | 107526    | 84.3                                        | 240.1                                        | 2.19E-04            | x                |
| Traf5         | 22033     | 5.3                                         | 15.1                                         | 1.69E-03            | x                |
| Xkrx          | 331524    | 12.8                                        | 36.2                                         | 4.99E-04            |                  |
| Ly6i          | 57248     | 55.3                                        | 156.8                                        | 5.96E-04            |                  |
| Tlr12         | 384059    | 1.7                                         | 4.8                                          | 1.11E-02            |                  |
| Alox5ap       | 11690     | 5.9                                         | 16.5                                         | 2.01E-02            | x                |
| Cd33          | 12489     | 3.4                                         | 9.3                                          | 4.26E-03            |                  |
| Smim24        | 72273     | 8.6                                         | 23.8                                         | 1.31E-02            |                  |
| Gas5          | 14455     | 8.0                                         | 22.0                                         | 1.70E-03            |                  |
| Bfsp2         | 107993    | 3.4                                         | 9.3                                          | 1.26E-02            |                  |
| Tlcd2         | 380712    | 4.3                                         | 11.9                                         | 9.89E-03            | x                |
| Phyhdl1       | 227696    | 7.6                                         | 20.7                                         | 4.24E-03            | x                |
| Ddit4         | 74747     | 15.1                                        | 41.3                                         | 1.34E-03            |                  |
| Gpr183        | 321019    | 7.1                                         | 19.3                                         | 2.06E-03            |                  |
| Cd3g          | 12502     | 3.6                                         | 9.7                                          | 4.35E-02            |                  |
| Havcr1        | 171283    | 3.6                                         | 9.8                                          | 1.74E-02            |                  |
| Hmox1         | 15368     | 204.0                                       | 550.1                                        | 3.69E-04            | x                |
| Gpsm3         | 106512    | 18.6                                        | 49.9                                         | 2.33E-03            |                  |
| Cd52          | 23833     | 2349.6                                      | 6319.1                                       | 3.30E-04            | x                |
| Fchsdl2       | 207278    | 17.9                                        | 48.0                                         | 1.09E-03            | x                |
| Phlda3        | 27280     | 2.2                                         | 6.0                                          | 3.20E-02            |                  |
| Cd37          | 12493     | 165.5                                       | 441.4                                        | 7.64E-04            | x                |
| Mapk12        | 29857     | 6.6                                         | 17.7                                         | 4.64E-03            | x                |
| Rel           | 19696     | 1.8                                         | 4.7                                          | 2.42E-02            | x                |
| Nrm           | 106582    | 5.6                                         | 14.8                                         | 8.25E-03            |                  |
| Ms4a1         | 12482     | 113.1                                       | 299.4                                        | 5.02E-04            | x                |
| Fam69a        | 67266     | 12.9                                        | 33.8                                         | 1.35E-03            | x                |
| Gimap8        | 243374    | 7.0                                         | 18.3                                         | 1.95E-03            |                  |
| Ass1          | 11898     | 3.3                                         | 8.7                                          | 2.03E-02            |                  |
| Cib1          | 23991     | 25.1                                        | 65.6                                         | 9.07E-03            | x                |
| Fam49a        | 76820     | 3.9                                         | 10.2                                         | 4.28E-03            | x                |
| Nsmce1        | 67711     | 12.8                                        | 33.4                                         | 6.14E-03            | x                |
| Cd180         | 17079     | 68.6                                        | 177.2                                        | 8.62E-04            | x                |
| Pdia5         | 72599     | 4.3                                         | 10.9                                         | 1.11E-02            | x                |
| Twif2         | 23999     | 14.3                                        | 36.7                                         | 4.23E-03            |                  |
| Fau           | 14109     | 16.1                                        | 41.1                                         | 4.02E-02            |                  |
| AB124611      | 382062    | 35.7                                        | 90.6                                         | 1.64E-03            |                  |
| Lmo2          | 16909     | 13.9                                        | 35.3                                         | 2.71E-03            | x                |
| Relt          | 320100    | 2.6                                         | 6.7                                          | 1.10E-02            |                  |
| Plekhg5       | 269608    | 1.7                                         | 4.1                                          | 1.49E-02            |                  |
| Zecch11       | 230594    | 7.0                                         | 17.3                                         | 1.11E-02            | x                |
| Pld4          | 104759    | 94.6                                        | 234.6                                        | 1.69E-03            | x                |
| Fli3l         | 14256     | 9.9                                         | 24.5                                         | 1.45E-02            |                  |
| Sesn3         | 75747     | 2.5                                         | 6.0                                          | 2.71E-02            | x                |
| Izumo4        | 71564     | 12.0                                        | 29.2                                         | 1.45E-02            |                  |
| Fam65b        | 193385    | 8.2                                         | 20.1                                         | 2.63E-03            | x                |
| 9030617003Rik | 217830    | 1.7                                         | 4.1                                          | 2.20E-02            |                  |
| Cdkn2d        | 12581     | 12.6                                        | 30.4                                         | 1.49E-02            |                  |
| Haus8         | 76478     | 2.6                                         | 6.4                                          | 3.92E-02            |                  |
| Smpdl3a       | 57319     | 55.8                                        | 134.4                                        | 2.52E-03            | x                |
| Tnnt3         | 21957     | 3.0                                         | 7.2                                          | 3.80E-02            |                  |
| Neur13        | 214854    | 5.6                                         | 13.4                                         | 9.63E-03            | x                |
| Hest          | 23900     | 16.6                                        | 40.0                                         | 4.96E-02            | x                |
| Ikbke         | 56489     | 5.6                                         | 13.5                                         | 7.08E-03            |                  |
| Ms4a6c        | 73656     | 6.8                                         | 16.3                                         | 2.18E-02            | x                |
| Cep89         | 72140     | 2.2                                         | 5.3                                          | 2.64E-02            |                  |
| Smim14        | 68552     | 40.3                                        | 95.5                                         | 4.82E-03            |                  |
| Ptp4a3        | 19245     | 35.1                                        | 82.7                                         | 4.24E-03            |                  |
| 1500012F01Rik | 68949     | 8.9                                         | 20.9                                         | 3.71E-02            |                  |
| Gbp2          | 14469     | 7.3                                         | 17.0                                         | 1.00E-02            | x                |
| Btg1          | 12226     | 13.8                                        | 32.2                                         | 4.24E-03            | x                |
| Klrg2         | 74253     | 4.1                                         | 9.6                                          | 1.99E-02            |                  |
| Dnaja4        | 58233     | 2.6                                         | 5.9                                          | 2.01E-02            |                  |
| Slnf2         | 20556     | 23.8                                        | 55.0                                         | 1.10E-02            | x                |
| Cnpy3         | 72029     | 34.4                                        | 79.2                                         | 5.25E-03            | x                |
| Mndal         | 100040462 | 33.0                                        | 75.8                                         | 1.26E-02            |                  |
| B4galt5       | 56336     | 3.7                                         | 8.4                                          | 1.46E-02            |                  |
| Wdfy1         | 69368     | 2.1                                         | 4.7                                          | 3.62E-02            |                  |
| Lpp           | 210126    | 3.0                                         | 6.9                                          | 2.85E-02            | x                |
| Lpxn          | 107321    | 28.7                                        | 65.5                                         | 8.51E-03            | x                |
| Ccdc122       | 108811    | 4.5                                         | 10.3                                         | 2.91E-02            | x                |
| Tmsb10        | 19240     | 32.8                                        | 73.9                                         | 1.75E-02            | x                |
| Sigirr        | 24058     | 11.0                                        | 24.7                                         | 2.11E-02            | x                |
| Irak3         | 73914     | 3.6                                         | 8.1                                          | 2.55E-02            |                  |
| Lynx1         | 23936     | 7.9                                         | 17.8                                         | 1.10E-02            |                  |

| Symbol        | EntrezID  | <i>Prdm1</i> <sup>+/gfp</sup><br>expression | <i>Prdm1</i> <sup>fl/gfp</sup><br>expression | Adjusted<br>P.Value | Blimp-1<br>bound |
|---------------|-----------|---------------------------------------------|----------------------------------------------|---------------------|------------------|
| Mir703        | 735265    | 213.7                                       | 477.8                                        | 2.43E-02            |                  |
| Bmyc          | 107771    | 40.6                                        | 90.2                                         | 1.52E-02            |                  |
| Itgb7         | 16421     | 152.5                                       | 339.2                                        | 4.00E-03            |                  |
| Rps27rt       | 100043813 | 908.4                                       | 2020.4                                       | 1.78E-02            |                  |
| Haao          | 107766    | 12.8                                        | 28.1                                         | 2.55E-02            | x                |
| Kmo           | 98256     | 34.6                                        | 75.9                                         | 8.75E-03            | x                |
| Rsrp1         | 27981     | 82.7                                        | 181.4                                        | 3.59E-03            |                  |
| Tk2           | 57813     | 17.4                                        | 38.1                                         | 1.39E-02            | x                |
| Akna          | 100182    | 13.4                                        | 29.3                                         | 1.83E-02            |                  |
| Fam46a        | 212943    | 2.8                                         | 6.1                                          | 2.40E-02            |                  |
| Usp11         | 236733    | 7.2                                         | 15.7                                         | 1.64E-02            |                  |
| Parp3         | 235587    | 7.0                                         | 15.3                                         | 2.01E-02            | x                |
| Rac2          | 19354     | 134.6                                       | 292.5                                        | 8.55E-03            |                  |
| S100a11       | 20195     | 63.6                                        | 137.8                                        | 2.42E-02            |                  |
| H2-DMb1       | 14999     | 36.4                                        | 78.4                                         | 1.24E-02            |                  |
| Vwa5a         | 67776     | 6.1                                         | 13.1                                         | 2.06E-02            | x                |
| Clic1         | 114584    | 140.4                                       | 302.1                                        | 1.10E-02            | x                |
| Bcl3          | 12051     | 11.2                                        | 23.9                                         | 2.33E-02            | x                |
| Ccdc12        | 72654     | 15.7                                        | 33.4                                         | 4.13E-02            | x                |
| Gng10         | 14700     | 49.2                                        | 105.0                                        | 2.06E-02            | x                |
| Fcrl1         | 229499    | 24.3                                        | 51.7                                         | 2.06E-02            | x                |
| Crip1         | 12925     | 227.5                                       | 484.8                                        | 2.70E-02            |                  |
| Tom34         | 67145     | 14.6                                        | 31.0                                         | 2.06E-02            |                  |
| Inpp1         | 16332     | 5.7                                         | 12.2                                         | 2.17E-02            |                  |
| Arhgap17      | 70497     | 17.5                                        | 37.0                                         | 1.78E-02            | x                |
| Srms          | 20811     | 9.1                                         | 19.3                                         | 2.31E-02            |                  |
| Snx8          | 231834    | 14.2                                        | 30.1                                         | 2.13E-02            | x                |
| Gm5424        | 432466    | 65.3                                        | 138.2                                        | 1.67E-02            |                  |
| Trim12a       | 76681     | 15.7                                        | 33.3                                         | 2.31E-02            |                  |
| Tacstd2       | 56753     | 3.2                                         | 6.8                                          | 3.20E-02            |                  |
| Pkp3          | 56460     | 12.6                                        | 26.6                                         | 2.54E-02            |                  |
| Dennd2d       | 72121     | 10.3                                        | 21.7                                         | 2.33E-02            | x                |
| Lair1         | 52855     | 3.6                                         | 7.6                                          | 4.14E-02            |                  |
| Flna          | 192176    | 18.9                                        | 39.7                                         | 1.73E-02            |                  |
| Ifi30         | 65972     | 98.9                                        | 208.0                                        | 1.94E-02            |                  |
| Mbp           | 17196     | 4.1                                         | 8.6                                          | 2.31E-02            |                  |
| Ets1          | 23871     | 24.6                                        | 51.7                                         | 1.30E-02            | x                |
| Elf4          | 56501     | 11.8                                        | 24.9                                         | 2.41E-02            | x                |
| Ryr1          | 20190     | 3.1                                         | 6.4                                          | 4.33E-02            |                  |
| Sp110         | 109032    | 13.5                                        | 28.2                                         | 2.99E-02            | x                |
| Limd2         | 67803     | 101.2                                       | 210.1                                        | 1.53E-02            | x                |
| Lipe          | 15450     | 26.1                                        | 54.1                                         | 2.70E-02            |                  |
| Phe2          | 54383     | 10.4                                        | 21.4                                         | 2.31E-02            | x                |
| Gm12854       | 100502897 | 25.6                                        | 52.6                                         | 4.55E-02            |                  |
| 2410006H16Rik | 69221     | 42.6                                        | 87.5                                         | 4.14E-02            |                  |
| 4930523C07Rik | 67647     | 12.2                                        | 24.9                                         | 2.25E-02            | x                |
| Chst3         | 53374     | 6.8                                         | 13.9                                         | 2.58E-02            | x                |
| Neil1         | 72774     | 39.4                                        | 79.8                                         | 2.61E-02            | x                |
| Coq2          | 71883     | 20.3                                        | 41.2                                         | 3.85E-02            |                  |
| Gmp1          | 78816     | 8.1                                         | 16.5                                         | 3.06E-02            |                  |
| Fgd2          | 26382     | 8.2                                         | 16.6                                         | 3.96E-02            | x                |
| Dennd4b       | 229541    | 9.1                                         | 18.3                                         | 2.88E-02            | x                |
| Tbc1d14       | 100855    | 11.0                                        | 22.2                                         | 2.72E-02            | x                |
| Upb1          | 103149    | 24.6                                        | 49.3                                         | 4.96E-02            |                  |
| Capg          | 12332     | 267.2                                       | 534.5                                        | 2.70E-02            |                  |
| Ptpn1         | 19246     | 34.9                                        | 69.6                                         | 2.17E-02            | x                |
| Pim2          | 18715     | 141.9                                       | 281.4                                        | 2.11E-02            |                  |
| Rapgef1       | 107746    | 104.7                                       | 207.4                                        | 3.40E-02            |                  |
| Bank1         | 242248    | 18.0                                        | 35.5                                         | 3.36E-02            |                  |
| Ablim1        | 226251    | 14.3                                        | 28.2                                         | 3.83E-02            |                  |
| Ly6d          | 17068     | 1663.5                                      | 3270.5                                       | 2.00E-02            |                  |
| Ints4         | 101861    | 27.2                                        | 53.5                                         | 3.22E-02            |                  |
| Icam1         | 15894     | 42.9                                        | 83.9                                         | 3.17E-02            |                  |
| Ctso          | 229445    | 84.0                                        | 162.7                                        | 3.06E-02            |                  |
| Ctsc          | 13032     | 69.3                                        | 134.0                                        | 2.56E-02            |                  |
| Snn           | 20621     | 68.4                                        | 131.5                                        | 3.38E-02            |                  |
| Cd200         | 17470     | 25.9                                        | 49.4                                         | 4.33E-02            |                  |
| Fmnl1         | 57778     | 28.2                                        | 53.8                                         | 4.57E-02            |                  |
| Rps11         | 27207     | 1284.8                                      | 2442.6                                       | 3.70E-02            |                  |
| Stk38         | 106504    | 21.7                                        | 41.2                                         | 4.56E-02            |                  |
| Cd79b         | 15985     | 717.8                                       | 1361.9                                       | 3.68E-02            |                  |
| G6pdx         | 14381     | 29.2                                        | 55.2                                         | 4.68E-02            |                  |
| Laptm5        | 16792     | 480.5                                       | 888.2                                        | 4.19E-02            |                  |
| Eef1a1        | 13627     | 2278.9                                      | 4206.0                                       | 4.09E-02            |                  |
| Arhgdib       | 11857     | 430.3                                       | 790.2                                        | 4.76E-02            |                  |
| Klf2          | 16598     | 133.1                                       | 213.5                                        | 4.43E-02            |                  |
| Dusp1         | 19252     | 162.9                                       | 94.8                                         | 1.36E-02            |                  |

| Symbol        | EntrezID | <i>Prdm1</i> <sup>+/gfp</sup><br>expression | <i>Prdm1</i> <sup>fl/gfp</sup><br>expression | Adjusted<br>P.Value | Blimp-1<br>bound |
|---------------|----------|---------------------------------------------|----------------------------------------------|---------------------|------------------|
| Zbtb38        | 245007   | 16.6                                        | 9.6                                          | 3.85E-02            |                  |
| Kif13b        | 16554    | 7.8                                         | 4.4                                          | 4.56E-02            |                  |
| Rrbp1         | 81910    | 109.5                                       | 59.5                                         | 4.31E-02            |                  |
| Edem3         | 66967    | 65.2                                        | 35.2                                         | 4.43E-02            | x                |
| Ergic1        | 67458    | 249.8                                       | 134.5                                        | 3.99E-02            |                  |
| Ppapdc1b      | 71910    | 214.3                                       | 115.3                                        | 4.62E-02            |                  |
| Syvn1         | 74126    | 204.7                                       | 109.8                                        | 3.92E-02            |                  |
| Epb4.112      | 13822    | 26.2                                        | 14.0                                         | 4.35E-02            | x                |
| Atp2a2        | 11938    | 78.3                                        | 41.7                                         | 3.85E-02            |                  |
| Slc33a1       | 11416    | 96.8                                        | 51.5                                         | 4.40E-02            | x                |
| 1830127L07Rik | 546643   | 94.9                                        | 50.4                                         | 2.52E-02            |                  |
| Phgdh         | 236539   | 110.7                                       | 58.5                                         | 4.05E-02            |                  |
| Shmt2         | 108037   | 121.3                                       | 64.0                                         | 3.70E-02            |                  |
| Slc1a5        | 20514    | 82.7                                        | 43.6                                         | 3.69E-02            |                  |
| Xbp1          | 22433    | 3793.3                                      | 1991.7                                       | 2.91E-02            |                  |
| Tns3          | 319939   | 57.7                                        | 30.3                                         | 2.70E-02            |                  |
| Gusb          | 110006   | 135.2                                       | 70.8                                         | 3.56E-02            |                  |
| Dvl3          | 13544    | 11.2                                        | 5.9                                          | 4.15E-02            |                  |
| Bcar3         | 29815    | 31.5                                        | 16.5                                         | 4.56E-02            |                  |
| Mfsd4         | 213006   | 24.4                                        | 12.7                                         | 4.37E-02            |                  |
| Slc17a5       | 235504   | 25.9                                        | 13.5                                         | 4.79E-02            |                  |
| Mgll          | 23945    | 16.4                                        | 8.6                                          | 4.52E-02            |                  |
| Cpeb2         | 231207   | 21.1                                        | 10.9                                         | 4.10E-02            |                  |
| H13           | 14950    | 189.1                                       | 97.6                                         | 2.01E-02            |                  |
| Chpf          | 74241    | 60.6                                        | 31.1                                         | 3.52E-02            |                  |
| Cpped1        | 223978   | 19.6                                        | 10.0                                         | 4.56E-02            |                  |
| Clptm11       | 218335   | 545.0                                       | 279.1                                        | 2.17E-02            |                  |
| Slamf9        | 98365    | 50.7                                        | 25.9                                         | 4.46E-02            |                  |
| Samsn1        | 67742    | 29.2                                        | 14.9                                         | 4.46E-02            |                  |
| Sec24a        | 77371    | 30.6                                        | 15.6                                         | 2.74E-02            |                  |
| Csrnp1        | 215418   | 55.3                                        | 28.0                                         | 3.90E-02            |                  |
| Zfp36         | 22695    | 682.7                                       | 343.5                                        | 6.16E-03            |                  |
| Ckb           | 12709    | 23.7                                        | 11.9                                         | 4.91E-02            |                  |
| Prrg4         | 228413   | 25.3                                        | 12.7                                         | 1.61E-02            | x                |
| Slc17a9       | 228993   | 22.1                                        | 11.0                                         | 3.85E-02            | x                |
| Lmbrd2        | 320506   | 8.8                                         | 4.4                                          | 3.47E-02            |                  |
| Cdk16         | 18555    | 28.3                                        | 14.1                                         | 3.19E-02            |                  |
| Ralgds        | 19730    | 27.4                                        | 13.6                                         | 2.64E-02            |                  |
| Slc6a9        | 14664    | 15.4                                        | 7.6                                          | 3.38E-02            | x                |
| Cpeb3         | 208922   | 15.2                                        | 7.5                                          | 2.49E-02            | x                |
| Slc16a6       | 104681   | 10.1                                        | 5.0                                          | 3.18E-02            |                  |
| Rrm2          | 20135    | 21.8                                        | 10.7                                         | 3.46E-02            |                  |
| Fam188a       | 66960    | 13.4                                        | 6.6                                          | 4.07E-02            |                  |
| Cdh23         | 22295    | 4.1                                         | 2.0                                          | 2.64E-02            |                  |
| Fndc3b        | 72007    | 42.1                                        | 20.5                                         | 1.50E-02            | x                |
| Fam46c        | 74645    | 634.0                                       | 307.9                                        | 1.10E-02            | x                |
| B3gnt9        | 97440    | 33.5                                        | 16.2                                         | 2.33E-02            | x                |
| Cad           | 69719    | 36.2                                        | 17.4                                         | 1.38E-02            |                  |
| Ago2          | 239528   | 11.5                                        | 5.5                                          | 5.98E-03            |                  |
| Cldn7         | 53624    | 16.4                                        | 7.8                                          | 4.56E-02            |                  |
| Itgav         | 16410    | 8.7                                         | 4.1                                          | 2.01E-02            | x                |
| Wipi1         | 52639    | 79.7                                        | 37.9                                         | 1.52E-02            |                  |
| Capn5         | 12337    | 60.5                                        | 28.8                                         | 1.28E-02            |                  |
| Teirg1        | 27060    | 30.0                                        | 14.2                                         | 1.92E-02            |                  |
| Slc44a1       | 100434   | 90.5                                        | 42.9                                         | 9.91E-03            | x                |
| Psat1         | 107272   | 37.3                                        | 17.7                                         | 1.49E-02            | x                |
| Chst11        | 58250    | 13.8                                        | 6.6                                          | 1.83E-02            | x                |
| Plekhh3       | 217198   | 6.7                                         | 3.2                                          | 4.56E-02            |                  |
| Fcna          | 14133    | 118.5                                       | 56.0                                         | 3.36E-03            |                  |
| Kat2b         | 18519    | 9.0                                         | 4.2                                          | 2.05E-02            | x                |
| Cd93          | 17064    | 48.1                                        | 22.6                                         | 1.27E-02            | x                |
| Top2a         | 21973    | 13.8                                        | 6.5                                          | 2.33E-02            |                  |
| Creld2        | 76737    | 957.4                                       | 447.8                                        | 9.29E-03            |                  |
| Cers6         | 241447   | 9.3                                         | 4.3                                          | 1.36E-02            |                  |
| Cd51          | 11801    | 55.9                                        | 26.1                                         | 3.03E-03            |                  |
| Dusp14        | 56405    | 24.8                                        | 11.5                                         | 3.11E-02            |                  |
| Gpr155        | 68526    | 85.8                                        | 39.7                                         | 7.47E-03            |                  |
| Bbs9          | 319845   | 21.7                                        | 10.0                                         | 1.47E-02            | x                |
| Gpr55         | 227326   | 97.1                                        | 44.9                                         | 8.63E-03            |                  |
| Tmem150a      | 232086   | 20.7                                        | 9.5                                          | 2.20E-02            |                  |
| H1f0          | 14958    | 107.1                                       | 49.1                                         | 7.49E-03            |                  |
| Ltf           | 17002    | 11.7                                        | 5.3                                          | 2.52E-02            |                  |
| Ehd4          | 98878    | 103.6                                       | 47.1                                         | 7.12E-03            |                  |
| Slc7a5        | 20539    | 147.6                                       | 66.8                                         | 6.03E-03            | x                |
| 5031425E22Rik | 269630   | 16.2                                        | 7.3                                          | 1.49E-02            |                  |
| H2-T24        | 15042    | 66.6                                        | 30.1                                         | 8.54E-03            |                  |
| Fam214a       | 235493   | 97.5                                        | 44.0                                         | 5.37E-03            |                  |

| Symbol        | EntrezID  | <i>Prdm1</i> <sup>+/gfp</sup><br>expression | <i>Prdm1</i> <sup>fl/gfp</sup><br>expression | Adjusted<br>P.Value | Blimp-1<br>bound |
|---------------|-----------|---------------------------------------------|----------------------------------------------|---------------------|------------------|
| Twsg1         | 65960     | 14.9                                        | 6.6                                          | 9.66E-03            |                  |
| Camk2a        | 12322     | 8.5                                         | 3.8                                          | 1.29E-02            |                  |
| Ggh           | 14590     | 128.0                                       | 56.7                                         | 6.29E-03            |                  |
| Tmem63b       | 224807    | 6.6                                         | 2.9                                          | 2.17E-02            |                  |
| C330027C09Rik | 224171    | 4.2                                         | 1.9                                          | 4.16E-02            |                  |
| Gpx3          | 14778     | 9.4                                         | 4.1                                          | 3.75E-02            |                  |
| Tigit         | 100043314 | 108.9                                       | 47.4                                         | 9.91E-03            | x                |
| Atp6v0a1      | 11975     | 142.0                                       | 61.8                                         | 3.33E-03            | x                |
| Kcnmb4os2     | 100504412 | 64.0                                        | 27.8                                         | 1.19E-02            |                  |
| Edem1         | 192193    | 628.4                                       | 272.7                                        | 2.44E-03            |                  |
| Dpep2         | 319446    | 4.9                                         | 2.1                                          | 4.62E-02            |                  |
| Cited4        | 56222     | 9.5                                         | 4.1                                          | 3.92E-02            |                  |
| Klf4          | 16600     | 5.9                                         | 2.5                                          | 1.29E-02            |                  |
| Adssl1        | 11565     | 85.4                                        | 36.5                                         | 4.09E-03            |                  |
| Abcb1b        | 18669     | 27.7                                        | 11.8                                         | 5.21E-03            | x                |
| Mki67         | 17345     | 12.7                                        | 5.4                                          | 9.86E-04            |                  |
| Lgals3bp      | 19039     | 44.8                                        | 19.0                                         | 8.20E-03            |                  |
| Slc43a1       | 72401     | 10.1                                        | 4.2                                          | 1.11E-02            |                  |
| AI504432      | 229694    | 6.9                                         | 2.9                                          | 6.05E-03            |                  |
| Fkbp11        | 66120     | 250.1                                       | 101.8                                        | 1.62E-03            |                  |
| Arhgap6       | 11856     | 7.9                                         | 3.2                                          | 3.72E-03            |                  |
| Pycr1         | 209027    | 66.5                                        | 26.8                                         | 1.70E-03            |                  |
| Tram2         | 170829    | 108.1                                       | 43.5                                         | 2.43E-03            | x                |
| Fads3         | 60527     | 7.5                                         | 3.0                                          | 9.22E-03            |                  |
| Gpd1          | 14555     | 4.1                                         | 1.7                                          | 3.91E-02            |                  |
| Vav3          | 57257     | 4.7                                         | 1.9                                          | 6.16E-03            |                  |
| Nugge         | 100503545 | 36.5                                        | 14.5                                         | 2.31E-03            |                  |
| Gnaz          | 14687     | 5.0                                         | 2.0                                          | 3.47E-02            |                  |
| Rhob          | 11852     | 539.1                                       | 213.3                                        | 1.65E-03            |                  |
| Pik3cg        | 30955     | 54.1                                        | 21.3                                         | 9.36E-04            | x                |
| Junb          | 16477     | 404.7                                       | 157.8                                        | 1.10E-03            | x                |
| Fos           | 14281     | 1377.6                                      | 536.3                                        | 1.44E-05            | x                |
| Aplp1         | 11803     | 8.1                                         | 3.1                                          | 9.91E-03            |                  |
| Ackr3         | 12778     | 5.1                                         | 2.0                                          | 1.64E-02            |                  |
| Slc7a3        | 11989     | 6.8                                         | 2.6                                          | 1.14E-02            |                  |
| Gabra4        | 14397     | 8.1                                         | 3.1                                          | 4.01E-03            |                  |
| AI848285      | 435145    | 6.2                                         | 2.4                                          | 2.78E-02            |                  |
| Trp53imp1     | 60599     | 535.2                                       | 201.0                                        | 4.00E-04            | x                |
| Bcl2l1        | 12048     | 10.4                                        | 3.9                                          | 3.72E-03            | x                |
| Txndc5        | 105245    | 3976.4                                      | 1473.0                                       | 1.86E-04            |                  |
| Xrec3         | 74335     | 9.7                                         | 3.6                                          | 3.59E-03            |                  |
| Cd163         | 93671     | 12.4                                        | 4.6                                          | 9.53E-03            |                  |
| Ndufa4l2      | 407790    | 4.8                                         | 1.7                                          | 4.78E-02            |                  |
| Kenj10        | 16513     | 7.1                                         | 2.6                                          | 2.12E-02            |                  |
| Gfi1          | 14581     | 9.3                                         | 3.3                                          | 2.36E-03            | x                |
| Klf6          | 23849     | 80.2                                        | 28.0                                         | 8.48E-03            | x                |
| 4930428O21Rik | 654809    | 4.4                                         | 1.5                                          | 1.40E-02            |                  |
| Cer3          | 12771     | 15.0                                        | 5.2                                          | 5.98E-03            |                  |
| Timd4         | 276891    | 4.1                                         | 1.4                                          | 3.99E-02            |                  |
| Abec3         | 76408     | 4.5                                         | 1.5                                          | 1.67E-02            |                  |
| Slco2b1       | 101488    | 8.0                                         | 2.7                                          | 1.16E-02            |                  |
| Tpst2         | 22022     | 102.6                                       | 34.0                                         | 1.60E-04            |                  |
| Alpl          | 11647     | 25.4                                        | 8.4                                          | 2.76E-04            | x                |
| Rgec          | 66214     | 100.3                                       | 33.0                                         | 2.38E-04            |                  |
| Mei2b         | 17259     | 22.9                                        | 7.5                                          | 8.62E-04            | x                |
| Vcam1         | 22329     | 113.8                                       | 37.1                                         | 1.76E-03            |                  |
| Dusp5         | 240672    | 29.5                                        | 9.6                                          | 1.10E-02            | x                |
| Slc40a1       | 53945     | 94.2                                        | 30.4                                         | 1.93E-04            |                  |
| Gpnmh         | 93695     | 5.2                                         | 1.7                                          | 1.38E-03            |                  |
| Itgad         | 381924    | 12.8                                        | 4.1                                          | 6.14E-03            |                  |
| Sema6d        | 214968    | 10.6                                        | 3.3                                          | 1.28E-04            | x                |
| Chp2          | 70261     | 6.5                                         | 2.0                                          | 1.49E-02            |                  |
| Tmed6         | 66269     | 5.0                                         | 1.5                                          | 2.18E-02            |                  |
| Itih5         | 209378    | 4.0                                         | 1.2                                          | 4.89E-04            |                  |
| Nrip1         | 268903    | 5.8                                         | 1.8                                          | 2.20E-04            | x                |
| Mertk         | 17289     | 7.1                                         | 2.1                                          | 1.10E-02            |                  |
| Fads2         | 56473     | 13.9                                        | 4.1                                          | 1.07E-03            |                  |
| Matn2         | 17181     | 7.8                                         | 2.3                                          | 2.68E-04            | x                |
| Jun           | 16476     | 633.4                                       | 187.8                                        | 7.83E-07            | x                |
| Lrrn3         | 16981     | 32.3                                        | 9.6                                          | 4.49E-05            |                  |
| Slc3a2        | 17254     | 1493.8                                      | 439.8                                        | 1.18E-05            |                  |
| Gadd45b       | 17873     | 43.8                                        | 12.9                                         | 8.41E-05            | x                |
| Thbd          | 21824     | 33.5                                        | 9.8                                          | 4.76E-05            |                  |
| Hes1          | 15205     | 6.3                                         | 1.8                                          | 5.23E-03            | x                |
| Kcna3         | 16491     | 6.5                                         | 1.8                                          | 4.69E-04            | x                |
| Clec2g        | 70809     | 22.8                                        | 6.4                                          | 4.95E-05            |                  |
| Hsd11b1       | 15483     | 92.1                                        | 25.4                                         | 1.86E-05            |                  |

| Symbol   | EntrezID  | <i>Prdm1</i> <sup>+/-gfp</sup><br>expression | <i>Prdm1</i> <sup>fl/gfp</sup><br>expression | Adjusted<br>P.Value | Blimp-1<br>bound |
|----------|-----------|----------------------------------------------|----------------------------------------------|---------------------|------------------|
| Kit      | 16590     | 4.3                                          | 1.2                                          | 1.46E-04            |                  |
| Dgkg     | 110197    | 4.6                                          | 1.3                                          | 9.26E-05            |                  |
| Spon1    | 233744    | 36.1                                         | 9.3                                          | 2.19E-05            | x                |
| Hist1h1c | 50708     | 81.4                                         | 20.5                                         | 1.30E-05            | x                |
| Ier2     | 15936     | 195.5                                        | 47.0                                         | 2.18E-05            | x                |
| Egr1     | 13653     | 184.2                                        | 43.2                                         | 9.20E-08            |                  |
| Cd69     | 12515     | 46.0                                         | 10.5                                         | 1.92E-04            | x                |
| Irs2     | 384783    | 27.3                                         | 6.1                                          | 6.70E-07            |                  |
| Chac1    | 69065     | 38.6                                         | 8.5                                          | 2.39E-06            |                  |
| Dusp4    | 319520    | 4.6                                          | 1.0                                          | 3.56E-04            | x                |
| Ctsk     | 13038     | 82.9                                         | 17.4                                         | 5.42E-07            |                  |
| Cd209f   | 69142     | 4.5                                          | 0.9                                          | 2.20E-02            |                  |
| Mmp9     | 17395     | 31.4                                         | 6.5                                          | 9.49E-07            |                  |
| Egr3     | 13655     | 9.7                                          | 1.9                                          | 3.02E-03            | x                |
| Egr2     | 13654     | 18.5                                         | 3.5                                          | 1.04E-04            | x                |
| Gm4242   | 100043120 | 85.1                                         | 15.9                                         | 5.24E-05            |                  |
| Pgam2    | 56012     | 19.4                                         | 3.4                                          | 6.02E-06            |                  |

**Supplementary Table 2.** UPR gene regulation by Blimp-1 and Xbp1.

Fold change in expression of the UPR genes for BM PCs from *Prdm1<sup>fl/gfp</sup>Cre<sup>ERT2</sup>* versus *Prdm1<sup>+gfp</sup>Cre<sup>ERT2</sup>* and *Xbp1<sup>fl/fl</sup>Prdm1<sup>+gfp</sup>Cre<sup>ERT2</sup>* versus *Xbp1<sup>+/+</sup>Prdm1<sup>+gfp</sup>Cre<sup>ERT2</sup>* mice, as described in **Fig. 5c, 6g** and **Supplementary Fig. 4a**. Genes are categorized according to the function their encoded protein is involved in. The right column indicates if ChIPseq has revealed Prdm1 binding site(s).

|                        | FC<br><i>Prdm1<sup>fl/gfp</sup></i> vs <i>+gfp</i> | FC<br><i>Xbp1<sup>fl/fl</sup></i> vs <i>+/+</i> | Blimp-1<br>bound |
|------------------------|----------------------------------------------------|-------------------------------------------------|------------------|
| <b>transcription</b>   |                                                    |                                                 |                  |
| Nfya                   | 1.26                                               | 1.18                                            |                  |
| Ddit3                  | 0.93                                               | 1.28                                            |                  |
| Nfyb                   | 0.9                                                | 1.04                                            |                  |
| Atf6b                  | 0.8                                                | 0.33                                            |                  |
| Atf6                   | 0.68                                               | 0.96                                            | x                |
| Atf4                   | 0.63                                               | 0.89                                            |                  |
| Xbp1                   | 0.53                                               |                                                 |                  |
| Prdm1                  |                                                    | 1.68                                            |                  |
| <b>signaling</b>       |                                                    |                                                 |                  |
| Mbtps2                 | 1.05                                               | 1.05                                            |                  |
| Eif2ak3                | 0.99                                               | 0.36                                            | x                |
| Mbtps1                 | 0.9                                                | 1.32                                            |                  |
| Eif2a                  | 0.9                                                | 1.65                                            | x                |
| Ppp2r5a                | 0.77                                               | 1.03                                            |                  |
| Ppp2r5b                | 0.68                                               | 0.77                                            |                  |
| Ppp1r15a               | 0.67                                               | 0.67                                            | x                |
| Ern1                   | 0.59                                               | 2.6                                             | x                |
| <b>protein folding</b> |                                                    |                                                 |                  |
| Txndc12                | 1.34                                               | 2.42                                            |                  |
| Canx                   | 1.13                                               | 0.91                                            | x                |
| Dnajc10                | 1.09                                               | 0.31                                            | x                |
| Pdia3                  | 0.99                                               | 0.75                                            | x                |
| Ero1l                  | 0.9                                                | 2.32                                            |                  |
| Ero1b                  | 0.87                                               | 0.2                                             |                  |
| Hsp90b1                | 0.84                                               | 1                                               | x                |
| Dnajb9                 | 0.83                                               | 0.06                                            |                  |
| Dnajc13                | 0.83                                               | 0.99                                            | x                |
| Pdia4                  | 0.82                                               | 1.71                                            | x                |
| Erp44                  | 0.81                                               | 0.12                                            | x                |
| P4hb                   | 0.8                                                | 0.38                                            | x                |
| Hspa5                  | 0.79                                               | 1.18                                            | x                |
| Fkbp4                  | 0.78                                               | 0.65                                            |                  |
| Manf                   | 0.78                                               | 0.45                                            | x                |
| Calr                   | 0.74                                               | 1.24                                            |                  |
| Pdia6                  | 0.74                                               | 0.78                                            |                  |
| Hyou1                  | 0.71                                               | 0.17                                            |                  |
| Dnajc3                 | 0.7                                                | 0.13                                            | x                |
| Dnajb11                | 0.63                                               | 0.22                                            |                  |
| Fkbp2                  | 0.57                                               | 0.55                                            |                  |
| Creld2                 | 0.47                                               | 0.39                                            |                  |
| Fkbp11                 | 0.41                                               | 0.05                                            |                  |

|                                        |      |      |   |
|----------------------------------------|------|------|---|
| Txndc5                                 | 0.37 | 0.68 |   |
| <b>misfolded protein degradation</b>   |      |      |   |
| Derl2                                  | 0.96 | 0.65 |   |
| March6                                 | 0.92 | 0.57 |   |
| Derl1                                  | 0.86 | 0.87 | x |
| Amfr                                   | 0.85 | 0.69 |   |
| Vcp                                    | 0.82 | 0.63 |   |
| Ppib                                   | 0.81 | 1.47 |   |
| Sil1                                   | 0.79 | 0.47 | x |
| Herpud1                                | 0.66 | 0.44 |   |
| Edem2                                  | 0.66 | 0.29 |   |
| Sel1l                                  | 0.6  | 1.19 |   |
| Derl3                                  | 0.59 | 0.35 |   |
| Edem3                                  | 0.54 | 0.57 | x |
| Syvn1                                  | 0.54 | 0.49 | x |
| Edem1                                  | 0.43 | 0.77 |   |
| <b>Post-translational modification</b> |      |      |   |
| Uggt1                                  | 1.34 | 0.51 | x |
| Man2b1                                 | 1.01 | 0.52 | x |
| Alg12                                  | 0.97 | 0.65 |   |
| Mpdu1                                  | 0.93 | 1.32 |   |
| Man1a                                  | 0.89 | 0.62 | x |
| Dpm3                                   | 0.89 | 0.84 |   |
| Fut8                                   | 0.88 | 0.83 | x |
| Extl3                                  | 0.88 | 0.67 |   |
| Man2b2                                 | 0.87 | 0.3  | x |
| Man2c1                                 | 0.87 | 2.11 |   |
| Man1c1                                 | 0.86 | 0.62 | x |
| Ddost                                  | 0.85 | 0.43 | x |
| Alg9                                   | 0.85 | 0.81 |   |
| Man2a2                                 | 0.84 | 0.52 |   |
| Dpagt1                                 | 0.75 | 0.35 | x |
| Alg1                                   | 0.73 | 0.39 |   |
| Alg10b                                 | 0.73 | 0.89 |   |
| Alg11                                  | 0.73 | 0.43 |   |
| Man2a1                                 | 0.71 | 1.26 | x |
| Alg2                                   | 0.7  | 0.37 |   |
| Dhdds                                  | 0.7  | 0.39 |   |
| Alg8                                   | 0.7  | 1.55 |   |
| Man1b1                                 | 0.69 | 0.74 | x |
| Alg5                                   | 0.68 | 0.85 | x |
| Alg14                                  | 0.68 | 0.61 | x |
| Alg3                                   | 0.61 | 1.4  |   |
| Man1a2                                 | 0.61 | 1.03 | x |
| Alg6                                   | 0.58 | 0.72 |   |
| <b>ER targeting and translocation</b>  |      |      |   |
| Serp1                                  | 0.94 | 0.38 | x |
| Ssr1                                   | 0.85 | 0.73 |   |
| Tpst1                                  | 0.81 | 1.08 |   |
| Ssr3                                   | 0.75 | 0.34 |   |
| Srp54c                                 | 0.74 | 0.46 |   |

|                             |      |      |   |
|-----------------------------|------|------|---|
| Ssr4                        | 0.71 | 0.28 |   |
| Sec61a1                     | 0.7  | 0.3  | x |
| Ssr2                        | 0.68 | 0.98 | x |
| Rpn1                        | 0.68 | 0.15 |   |
| Srpr                        | 0.65 | 0.32 |   |
| Wfs1                        | 0.63 | 0.59 |   |
| Srprb                       | 0.59 | 0.44 |   |
| Slc33a1                     | 0.53 | 0.41 | x |
| Tram2                       | 0.4  | 0.97 | x |
| Tpst2                       | 0.33 | 0.64 |   |
| <b>ER-golgi trafficking</b> |      |      |   |
| Sec24b                      | 1.07 | 1    | x |
| Sec24c                      | 0.88 | 0.84 | x |
| Lman2                       | 0.85 | 0.5  |   |
| Mcf2                        | 0.83 | 0.35 | x |
| Gosr2                       | 0.82 | 0.59 |   |
| Arf1                        | 0.8  | 0.78 |   |
| Sec16a                      | 0.8  | 0.71 |   |
| Dctn1                       | 0.79 | 0.97 |   |
| Sar1a                       | 0.78 | 0.62 |   |
| Sar1b                       | 0.77 | 0.88 |   |
| Sec23b                      | 0.77 | 0.35 | x |
| Sec13                       | 0.76 | 1.07 |   |
| Arfgap1                     | 0.74 | 1.16 |   |
| Sec31a                      | 0.74 | 0.81 |   |
| Preb                        | 0.73 | 0.34 | x |
| Arfgap3                     | 0.71 | 0.27 |   |
| Sec23a                      | 0.64 | 0.97 |   |
| Arcn1                       | 0.62 | 0.55 | x |
| Lman1                       | 0.58 | 0.62 | x |
| Sec24d                      | 0.57 | 0.24 |   |
| Ergic1                      | 0.54 | 0.71 |   |
| Sec24a                      | 0.51 | 0.98 |   |

**Supplementary Table 3.** Differentially expressed genes after *Xbp1* inactivation. Gene expression in BM PCs from *Xbp1<sup>fl/fl</sup>Prdm1<sup>+/-</sup>gfp<sup>CreERT2</sup>* versus *Xbp1<sup>+/+</sup>Prdm1<sup>+/-</sup>gfp<sup>CreERT2</sup>* mice as described in **Fig. 6**.

| Symbol   | EntrezID  | <i>Xbp1<sup>+/+</sup></i><br>expression | <i>Xbp1<sup>fl/fl</sup></i><br>expression | Adjusted<br>P.Value |
|----------|-----------|-----------------------------------------|-------------------------------------------|---------------------|
| Tsc22d1  | 21807     | 0.75                                    | 14.85                                     | 9.38E-04            |
| Slc7a3   | 11989     | 4.81                                    | 62.32                                     | 6.58E-04            |
| Smpd3b   | 100340    | 0.59                                    | 7.01                                      | 9.06E-03            |
| Atp1b1   | 11931     | 28.02                                   | 297.75                                    | 1.20E-03            |
| Ifitm1   | 68713     | 0.58                                    | 5.57                                      | 3.58E-02            |
| Cd36     | 12491     | 2.92                                    | 27.44                                     | 1.14E-03            |
| Rnase2b  | 54159     | 1.69                                    | 12.88                                     | 2.37E-02            |
| Dpp4     | 13482     | 3.51                                    | 23.01                                     | 1.40E-03            |
| Zfp365   | 216049    | 0.85                                    | 5.19                                      | 3.08E-02            |
| Cox6a2   | 12862     | 13.75                                   | 80.60                                     | 1.59E-02            |
| Acot7    | 70025     | 1.67                                    | 8.47                                      | 7.69E-03            |
| Apmap    | 71881     | 53.64                                   | 266.26                                    | 3.59E-04            |
| Crim1    | 50766     | 1.29                                    | 6.40                                      | 2.05E-02            |
| Bub1     | 12235     | 1.26                                    | 6.09                                      | 1.09E-02            |
| Gpr133   | 321019    | 2.51                                    | 12.04                                     | 1.49E-02            |
| Psmc3ip  | 19183     | 2.80                                    | 13.05                                     | 2.55E-02            |
| Gsto1    | 14873     | 8.68                                    | 40.33                                     | 1.87E-03            |
| Ly6d     | 17068     | 835.58                                  | 3782.32                                   | 4.24E-04            |
| Cyp39a1  | 56050     | 1.20                                    | 5.34                                      | 1.89E-02            |
| Serpinc1 | 11905     | 1.79                                    | 7.93                                      | 1.17E-02            |
| Cdea7    | 66953     | 1.00                                    | 4.27                                      | 4.84E-02            |
| Spag5    | 54141     | 1.32                                    | 5.60                                      | 3.47E-02            |
| Vegfa    | 22339     | 4.37                                    | 18.34                                     | 1.08E-02            |
| Sgol1    | 72415     | 1.12                                    | 4.60                                      | 2.43E-02            |
| Ncstn    | 59287     | 49.30                                   | 199.32                                    | 6.93E-04            |
| Arg1     | 11846     | 2.78                                    | 11.20                                     | 2.00E-02            |
| Pigs     | 276846    | 20.03                                   | 80.61                                     | 7.48E-04            |
| Rad51ap1 | 19362     | 1.22                                    | 4.88                                      | 4.96E-02            |
| Dtl      | 76843     | 2.09                                    | 8.33                                      | 1.77E-02            |
| Ska3     | 219114    | 1.51                                    | 5.96                                      | 2.27E-02            |
| Pole2    | 18974     | 2.36                                    | 9.31                                      | 3.38E-02            |
| Pole     | 18973     | 1.16                                    | 4.54                                      | 1.67E-02            |
| Chaf1b   | 110749    | 1.24                                    | 4.73                                      | 4.14E-02            |
| NA       | 100861774 | 4.90                                    | 18.55                                     | 1.42E-02            |
| Cenpt    | 320394    | 1.26                                    | 4.71                                      | 4.37E-02            |
| Smim3    | 106878    | 1.65                                    | 6.16                                      | 2.66E-02            |
| Itgam    | 16409     | 5.37                                    | 19.85                                     | 8.23E-03            |
| Ncapg    | 54392     | 7.31                                    | 27.01                                     | 4.02E-03            |
| S1pr1    | 13609     | 2.93                                    | 10.57                                     | 2.01E-02            |
| Snhg5    | 72655     | 8.83                                    | 31.89                                     | 1.84E-02            |
| Epcam    | 17075     | 79.59                                   | 284.03                                    | 1.49E-03            |
| Sgpp2    | 433323    | 2.88                                    | 10.16                                     | 1.15E-02            |
| Cer10    | 12777     | 42.75                                   | 146.66                                    | 1.90E-03            |
| Rnase4   | 58809     | 1.37                                    | 4.69                                      | 3.96E-02            |
| Tmsb10   | 19240     | 14.32                                   | 48.31                                     | 6.51E-03            |
| Kif11    | 16551     | 4.78                                    | 16.09                                     | 3.15E-02            |
| Rpia     | 19895     | 126.84                                  | 422.70                                    | 9.45E-04            |
| Atf5     | 107503    | 68.79                                   | 225.76                                    | 5.86E-03            |
| Spc24    | 67629     | 3.44                                    | 11.20                                     | 3.85E-02            |
| Cnpy4    | 66455     | 4.79                                    | 15.47                                     | 5.73E-03            |
| Shcbp1   | 20419     | 2.23                                    | 7.17                                      | 3.64E-02            |
| Ctsh     | 64138     | 178.34                                  | 572.55                                    | 7.98E-04            |
| Gimap7   | 231932    | 21.93                                   | 69.81                                     | 1.33E-02            |
| Vim      | 22352     | 32.57                                   | 103.10                                    | 3.07E-03            |
| Plxna1   | 18844     | 1.95                                    | 6.14                                      | 1.85E-02            |
| Nusap1   | 108907    | 5.69                                    | 17.78                                     | 1.51E-02            |
| Ncapg2   | 76044     | 21.56                                   | 67.34                                     | 3.85E-03            |
| Ilsra    | 16192     | 6.94                                    | 21.64                                     | 4.11E-02            |
| Cd48     | 12506     | 87.39                                   | 271.77                                    | 1.70E-03            |
| Scepep1  | 74617     | 75.66                                   | 235.00                                    | 9.39E-04            |
| Tg       | 21819     | 2.09                                    | 6.47                                      | 2.66E-02            |
| Cep89    | 72140     | 2.59                                    | 7.97                                      | 2.76E-02            |

| Symbol        | EntrezID  | <i>Xbp1<sup>+/+</sup></i><br>expression | <i>Xbp1<sup>fl/fl</sup></i><br>expression | Adjusted<br>P.Value |
|---------------|-----------|-----------------------------------------|-------------------------------------------|---------------------|
| Ripk3         | 56532     | 1.99                                    | 6.08                                      | 2.08E-02            |
| Ndc80         | 67052     | 1.65                                    | 4.94                                      | 4.92E-02            |
| Rbbp8         | 225182    | 4.28                                    | 12.79                                     | 6.52E-03            |
| Mem5          | 17218     | 9.39                                    | 27.98                                     | 1.68E-02            |
| Hsd11b1       | 15483     | 54.25                                   | 159.77                                    | 9.59E-03            |
| Sqle          | 20775     | 6.13                                    | 17.95                                     | 8.80E-03            |
| Psat1         | 107272    | 22.35                                   | 65.42                                     | 2.37E-03            |
| Tpx2          | 72119     | 3.79                                    | 11.02                                     | 4.34E-02            |
| Glipr1        | 73690     | 215.81                                  | 624.52                                    | 1.25E-03            |
| Lrpap1        | 16976     | 19.42                                   | 55.75                                     | 1.40E-03            |
| Kit           | 16590     | 2.22                                    | 6.36                                      | 1.00E-02            |
| Siglecg       | 243958    | 11.00                                   | 31.19                                     | 6.27E-03            |
| Ccr9          | 12769     | 4.07                                    | 11.50                                     | 1.10E-02            |
| Fyn           | 14360     | 10.27                                   | 29.03                                     | 1.58E-02            |
| Ckap2l        | 70466     | 3.05                                    | 8.61                                      | 4.70E-02            |
| 1500012f01Rik | 68949     | 8.86                                    | 24.90                                     | 3.08E-02            |
| Cnot6         | 104625    | 27.74                                   | 77.66                                     | 1.81E-02            |
| Hells         | 15201     | 4.72                                    | 13.20                                     | 3.14E-02            |
| Kif4          | 16571     | 1.87                                    | 5.22                                      | 4.35E-02            |
| Ncaph         | 215387    | 4.48                                    | 12.46                                     | 2.46E-02            |
| Arl4c         | 320982    | 1.73                                    | 4.80                                      | 2.03E-02            |
| Dhfr          | 13361     | 1.66                                    | 4.57                                      | 1.50E-02            |
| Klrg2         | 74253     | 2.33                                    | 6.39                                      | 2.76E-02            |
| Polr1         | 18968     | 2.48                                    | 6.79                                      | 2.49E-02            |
| Dhcr24        | 74754     | 6.02                                    | 16.47                                     | 2.98E-03            |
| Mem3          | 17215     | 10.71                                   | 29.22                                     | 2.59E-02            |
| A130040M12Rik | 319269    | 135.13                                  | 367.98                                    | 1.80E-02            |
| Cd40          | 21939     | 5.41                                    | 14.71                                     | 4.38E-02            |
| Prim1         | 19075     | 6.64                                    | 18.05                                     | 2.47E-02            |
| Ly6e          | 17069     | 1275.78                                 | 3448.93                                   | 2.05E-03            |
| Dnmt1         | 13433     | 13.51                                   | 36.42                                     | 3.02E-03            |
| Ggh           | 14590     | 51.87                                   | 139.63                                    | 2.28E-02            |
| Alpl          | 11647     | 19.75                                   | 53.07                                     | 2.19E-03            |
| Ipmk          | 69718     | 8.37                                    | 22.37                                     | 4.88E-03            |
| Dstn          | 56431     | 12.89                                   | 34.42                                     | 2.29E-02            |
| 2310061104Rik | 69662     | 5.93                                    | 15.71                                     | 2.50E-02            |
| Epsti1        | 108670    | 3.65                                    | 9.65                                      | 2.37E-02            |
| Top2a         | 21973     | 20.62                                   | 54.51                                     | 2.05E-02            |
| Sgk3          | 170755    | 10.42                                   | 27.41                                     | 1.14E-02            |
| Aldoc         | 11676     | 6.31                                    | 16.59                                     | 2.08E-02            |
| Gas5          | 14455     | 17.81                                   | 46.69                                     | 7.69E-03            |
| Psph          | 100678    | 20.07                                   | 52.50                                     | 7.95E-03            |
| 2810417H13Rik | 68026     | 9.49                                    | 24.74                                     | 4.70E-02            |
| Cdc25b        | 12531     | 8.19                                    | 21.33                                     | 2.68E-02            |
| Cd320         | 54219     | 4.94                                    | 12.86                                     | 3.03E-02            |
| Cdca3         | 14793     | 11.27                                   | 29.30                                     | 1.97E-02            |
| Ern1          | 78943     | 71.47                                   | 185.55                                    | 1.06E-02            |
| Gm10051       | 100039731 | 102.07                                  | 264.58                                    | 1.56E-02            |
| Gpr174        | 213439    | 4.09                                    | 10.56                                     | 1.79E-02            |
| Lhpp          | 76429     | 7.40                                    | 18.97                                     | 1.20E-02            |
| A530040E14Rik | 621875    | 51.13                                   | 130.84                                    | 2.57E-03            |
| Lmb1          | 16906     | 15.54                                   | 39.61                                     | 3.42E-02            |
| Golm1         | 105348    | 1.89                                    | 4.74                                      | 3.69E-02            |
| Ifitm3        | 66141     | 29.13                                   | 72.36                                     | 4.03E-02            |
| Gm8942        | 668041    | 161.64                                  | 400.16                                    | 2.02E-02            |
| Prr11         | 270906    | 2.55                                    | 6.32                                      | 2.28E-02            |
| Aspm          | 12316     | 2.01                                    | 4.96                                      | 1.62E-02            |
| Srgn          | 19073     | 691.46                                  | 1701.96                                   | 2.85E-03            |
| Bcl2l1        | 12048     | 9.65                                    | 23.75                                     | 1.00E-02            |
| Pkm           | 18746     | 78.55                                   | 193.10                                    | 3.94E-03            |
| Trp53i13      | 216964    | 8.28                                    | 20.34                                     | 3.47E-02            |
| Rcsd1         | 226594    | 8.79                                    | 21.56                                     | 2.49E-02            |
| Bzw2          | 66912     | 7.49                                    | 18.27                                     | 1.48E-02            |
| Acp5          | 11433     | 26.05                                   | 63.56                                     | 1.37E-02            |
| Ikbip         | 67454     | 7.14                                    | 17.31                                     | 3.67E-03            |
| Txndc12       | 66073     | 21.46                                   | 51.82                                     | 6.49E-03            |
| Prc1          | 233406    | 7.36                                    | 17.76                                     | 2.90E-02            |
| H2-Eb2        | 381091    | 16.64                                   | 40.10                                     | 4.84E-03            |
| A630001G21Rik | 319997    | 21.06                                   | 50.38                                     | 1.48E-02            |
| Mms22l        | 212377    | 2.01                                    | 4.77                                      | 4.74E-02            |
| Pigx          | 72084     | 17.45                                   | 41.34                                     | 1.47E-02            |
| Fkbp5         | 14229     | 3.54                                    | 8.35                                      | 1.38E-02            |
| Txndc16       | 70561     | 20.73                                   | 48.84                                     | 8.85E-03            |



| Symbol        | EntrezID  | <i>Xbp1</i> <sup>+/+</sup><br>expression | <i>Xbp1</i> <sup>n/n</sup><br>expression | Adjusted<br>P.Value |
|---------------|-----------|------------------------------------------|------------------------------------------|---------------------|
| D10Wsu102e    | 28109     | 14.20                                    | 33.24                                    | 3.02E-03            |
| 5830418P13Rik | 100529079 | 7.24                                     | 16.94                                    | 3.30E-02            |
| Aire          | 11634     | 4.08                                     | 9.47                                     | 4.56E-02            |
| Ero11         | 50527     | 15.71                                    | 36.38                                    | 9.46E-03            |
| Pim2          | 18715     | 74.51                                    | 172.01                                   | 2.76E-03            |
| H2-DMa        | 14998     | 40.21                                    | 92.48                                    | 1.84E-02            |
| Slc28a2       | 269346    | 4.12                                     | 9.48                                     | 1.90E-02            |
| Stard5        | 170460    | 34.24                                    | 78.08                                    | 2.86E-03            |
| Sp110         | 109032    | 18.08                                    | 41.08                                    | 7.69E-03            |
| Arhgap4       | 171207    | 7.56                                     | 17.17                                    | 1.09E-02            |
| Ppt1          | 19063     | 130.44                                   | 295.82                                   | 2.86E-03            |
| Cntnap1       | 53321     | 3.82                                     | 8.64                                     | 9.89E-03            |
| Pigf          | 18701     | 6.41                                     | 14.48                                    | 3.85E-02            |
| Rps19         | 20085     | 76.93                                    | 173.55                                   | 4.57E-02            |
| Pabpc1        | 18458     | 167.69                                   | 377.08                                   | 4.56E-03            |
| Rps26         | 27370     | 141.07                                   | 316.75                                   | 2.16E-02            |
| Ncapd2        | 68298     | 12.14                                    | 27.18                                    | 2.77E-02            |
| Mcm4          | 17217     | 9.31                                     | 20.66                                    | 3.25E-02            |
| Rfc4          | 106344    | 8.79                                     | 19.49                                    | 3.08E-02            |
| Topbp1        | 235559    | 12.78                                    | 28.26                                    | 2.10E-02            |
| Whsc1         | 107823    | 3.67                                     | 8.08                                     | 2.51E-02            |
| Bsg           | 12215     | 184.32                                   | 404.42                                   | 5.18E-03            |
| Slamf6        | 30925     | 11.52                                    | 25.28                                    | 8.85E-03            |
| Hcls1         | 15163     | 46.93                                    | 102.90                                   | 3.02E-03            |
| Lig1          | 16881     | 8.47                                     | 18.58                                    | 3.46E-02            |
| Tmem97        | 69071     | 5.69                                     | 12.37                                    | 3.69E-02            |
| Acap1         | 216859    | 14.89                                    | 32.34                                    | 9.46E-03            |
| Rpl7          | 19989     | 487.28                                   | 1056.64                                  | 9.04E-03            |
| Funde2        | 67391     | 13.06                                    | 28.24                                    | 7.69E-03            |
| Suv39h1       | 20937     | 4.81                                     | 10.39                                    | 4.50E-02            |
| Gusb          | 110006    | 84.84                                    | 183.00                                   | 3.07E-03            |
| Lynx1         | 23936     | 6.75                                     | 14.54                                    | 7.64E-03            |
| Rps2          | 16898     | 129.11                                   | 277.42                                   | 1.55E-02            |
| H2-K1         | 14972     | 1980.43                                  | 4249.99                                  | 4.56E-03            |
| Gm9835        | 100040018 | 15.49                                    | 33.18                                    | 1.93E-02            |
| Gm10052       | 654467    | 75.53                                    | 160.92                                   | 1.30E-02            |
| Tipin         | 66131     | 15.69                                    | 33.43                                    | 1.38E-02            |
| Snhg1         | 83673     | 28.12                                    | 59.65                                    | 4.70E-02            |
| Tcf19         | 106795    | 6.16                                     | 13.06                                    | 3.08E-02            |
| Slc43a3       | 58207     | 14.15                                    | 29.94                                    | 3.34E-02            |
| Man2c1        | 73744     | 19.97                                    | 42.20                                    | 4.88E-03            |
| B4gal1        | 14595     | 26.99                                    | 57.02                                    | 3.88E-03            |
| Hsd17b12      | 56348     | 18.01                                    | 38.01                                    | 5.85E-03            |
| Rpl27a        | 26451     | 29.14                                    | 61.42                                    | 1.72E-02            |
| Raph1         | 77300     | 5.44                                     | 11.42                                    | 2.86E-02            |
| Emc1          | 230866    | 4.92                                     | 10.32                                    | 2.64E-02            |
| Gm12191       | 666899    | 175.57                                   | 367.71                                   | 1.25E-02            |
| Rps11         | 27207     | 782.62                                   | 1635.64                                  | 5.36E-03            |
| Gimap8        | 243374    | 10.38                                    | 21.66                                    | 1.14E-02            |
| Zyx           | 22793     | 24.73                                    | 51.44                                    | 6.51E-03            |
| Ctsa          | 19025     | 34.28                                    | 71.24                                    | 3.24E-03            |
| Rnaset2b      | 68195     | 75.15                                    | 155.86                                   | 2.34E-02            |
| Ifi30         | 65972     | 36.58                                    | 75.83                                    | 3.17E-02            |
| Pepp1         | 23980     | 25.71                                    | 53.08                                    | 3.01E-02            |
| Eef1a1        | 13627     | 2152.12                                  | 4433.52                                  | 4.56E-03            |
| Ptprcap       | 19265     | 138.63                                   | 285.47                                   | 3.15E-02            |
| Gm11478       | 100504632 | 748.19                                   | 1540.21                                  | 8.85E-03            |
| Rpl4          | 67891     | 629.48                                   | 1293.51                                  | 3.28E-03            |
| Ncl           | 17975     | 55.58                                    | 114.04                                   | 9.17E-03            |
| Rtel1         | 269400    | 5.10                                     | 10.44                                    | 2.65E-02            |
| Bcap31        | 27061     | 95.97                                    | 196.34                                   | 8.85E-03            |
| Rasgrp2       | 19395     | 7.23                                     | 14.75                                    | 1.65E-02            |
| Cd79b         | 15985     | 604.65                                   | 1230.74                                  | 5.10E-03            |
| Rap1gap2      | 380711    | 8.93                                     | 18.17                                    | 9.48E-03            |
| Gm9457        | 669393    | 64.75                                    | 131.32                                   | 2.86E-02            |
| Rps15a        | 267019    | 29.84                                    | 60.45                                    | 2.08E-02            |
| Gm12174       | 620678    | 228.79                                   | 463.39                                   | 1.20E-02            |
| Rps7          | 20115     | 105.00                                   | 212.53                                   | 2.72E-02            |
| St3gal6       | 54613     | 13.17                                    | 26.66                                    | 1.10E-02            |
| H2-D1         | 14964     | 974.95                                   | 1971.90                                  | 4.88E-03            |
| Rexo2         | 104444    | 571.47                                   | 1151.30                                  | 4.04E-03            |
| Pon2          | 330260    | 89.63                                    | 180.57                                   | 7.69E-03            |
| Cldn7         | 53624     | 10.59                                    | 21.30                                    | 4.70E-02            |

| Symbol   | EntrezID  | <i>Xbp1</i> <sup>+/+</sup><br>expression | <i>Xbp1</i> <sup>n/n</sup><br>expression | Adjusted<br>P.Value |
|----------|-----------|------------------------------------------|------------------------------------------|---------------------|
| Gpatch2  | 67769     | 11.10                                    | 22.33                                    | 1.59E-02            |
| Sp140    | 434484    | 32.63                                    | 65.35                                    | 6.51E-03            |
| Lmnb2    | 16907     | 3.96                                     | 7.92                                     | 4.65E-02            |
| Txndc15  | 69672     | 28.16                                    | 56.31                                    | 1.61E-02            |
| Rnaset2a | 100037283 | 80.52                                    | 161.00                                   | 1.72E-02            |
| Enpp1    | 18605     | 97.01                                    | 193.62                                   | 6.37E-03            |
| Slc38a10 | 72055     | 74.17                                    | 37.25                                    | 3.97E-03            |
| Evc      | 59056     | 27.43                                    | 13.77                                    | 9.00E-03            |
| Dnajb2   | 56812     | 12.09                                    | 6.06                                     | 2.10E-02            |
| Coro2b   | 235431    | 34.52                                    | 17.28                                    | 1.20E-02            |
| Spg20    | 229285    | 12.30                                    | 6.15                                     | 9.06E-03            |
| Fam117b  | 72750     | 14.14                                    | 7.02                                     | 1.09E-02            |
| Lman2    | 66890     | 132.67                                   | 65.87                                    | 4.47E-03            |
| Dusp3    | 72349     | 8.87                                     | 4.40                                     | 1.48E-02            |
| Srp9     | 27058     | 103.92                                   | 51.51                                    | 1.52E-02            |
| Myzap    | 102371    | 18.93                                    | 9.37                                     | 3.17E-02            |
| Gm12060  | 100134990 | 33.89                                    | 16.78                                    | 4.63E-02            |
| Casc4    | 319996    | 5.35                                     | 2.65                                     | 3.40E-02            |
| Dnajc16  | 214063    | 7.82                                     | 3.87                                     | 1.82E-02            |
| Clpb     | 20480     | 13.14                                    | 6.50                                     | 1.48E-02            |
| Fdps     | 110196    | 11.61                                    | 5.74                                     | 4.79E-02            |
| Tmed3    | 66111     | 109.90                                   | 54.04                                    | 1.93E-02            |
| Gedh     | 270076    | 17.52                                    | 8.61                                     | 3.80E-02            |
| Otd1     | 71198     | 8.13                                     | 3.99                                     | 4.66E-02            |
| Tbl2     | 27368     | 17.46                                    | 8.56                                     | 5.59E-03            |
| Srp54a   | 24067     | 4.53                                     | 2.22                                     | 3.39E-02            |
| Nrros    | 224109    | 22.95                                    | 11.24                                    | 2.12E-02            |
| Syvn1    | 74126     | 185.24                                   | 90.66                                    | 6.15E-03            |
| Tpd52    | 21985     | 55.76                                    | 27.27                                    | 5.05E-03            |
| Cdk16    | 18555     | 29.92                                    | 14.63                                    | 7.69E-03            |
| Hcfc2    | 67933     | 20.59                                    | 10.05                                    | 3.06E-02            |
| Itgav    | 16410     | 9.15                                     | 4.45                                     | 1.06E-02            |
| Tssc4    | 56844     | 36.64                                    | 17.81                                    | 2.53E-02            |
| B2m      | 12010     | 8468.71                                  | 4114.35                                  | 5.30E-03            |
| Ufc1     | 66155     | 80.70                                    | 39.16                                    | 1.10E-02            |
| Snd1     | 56463     | 193.32                                   | 93.70                                    | 3.02E-03            |
| Ltb      | 16994     | 29.55                                    | 14.31                                    | 3.51E-02            |
| Rappel2  | 76089     | 5.47                                     | 2.65                                     | 4.74E-02            |
| Bmf      | 171543    | 16.86                                    | 8.16                                     | 4.52E-02            |
| Fam73a   | 215708    | 13.39                                    | 6.48                                     | 1.15E-02            |
| Cep250   | 16328     | 21.99                                    | 10.61                                    | 3.35E-02            |
| Shpk     | 74637     | 6.18                                     | 2.96                                     | 3.32E-02            |
| Dusp7    | 235584    | 14.81                                    | 7.10                                     | 1.10E-02            |
| Slc35b1  | 110172    | 149.22                                   | 71.35                                    | 9.46E-03            |
| Slc35e1  | 270066    | 25.33                                    | 12.11                                    | 3.67E-03            |
| Zbtb4    | 75580     | 15.56                                    | 7.44                                     | 1.36E-02            |
| Tmem173  | 72512     | 61.55                                    | 29.38                                    | 6.90E-03            |
| Nudt22   | 68323     | 32.00                                    | 15.26                                    | 3.51E-02            |
| Hs2st1   | 23908     | 7.46                                     | 3.55                                     | 1.50E-02            |
| Papss1   | 23971     | 13.48                                    | 6.41                                     | 8.50E-03            |
| Fam132a  | 67389     | 13.35                                    | 6.34                                     | 4.14E-02            |
| Cnst     | 226744    | 42.94                                    | 20.37                                    | 1.48E-02            |
| Card6    | 239319    | 11.86                                    | 5.62                                     | 1.93E-02            |
| Trp53i1  | 277414    | 143.10                                   | 67.68                                    | 3.49E-03            |
| Mlycd    | 56690     | 13.67                                    | 6.46                                     | 1.58E-02            |
| Cd99l2   | 171486    | 6.76                                     | 3.19                                     | 1.59E-02            |
| Ergic2   | 67456     | 32.31                                    | 15.23                                    | 4.07E-03            |
| Kremen1  | 84035     | 19.87                                    | 9.37                                     | 4.41E-03            |
| Sil1     | 81500     | 124.93                                   | 58.54                                    | 9.04E-03            |
| Srp68    | 217337    | 84.75                                    | 39.70                                    | 3.97E-03            |
| Ufm1     | 67890     | 27.19                                    | 12.73                                    | 3.43E-03            |
| Ssh1     | 231637    | 7.40                                     | 3.45                                     | 3.61E-02            |
| Nacc2    | 67991     | 14.45                                    | 6.73                                     | 6.39E-03            |
| Pink1    | 68943     | 104.30                                   | 48.32                                    | 7.43E-03            |
| Mia3     | 338366    | 66.29                                    | 30.68                                    | 2.86E-02            |
| Hist1hc  | 50708     | 38.30                                    | 17.71                                    | 2.40E-02            |
| Oat      | 18242     | 46.57                                    | 21.51                                    | 5.77E-03            |
| Zecch24  | 71918     | 5.05                                     | 2.33                                     | 1.35E-02            |
| Pdcd1lg2 | 58205     | 12.37                                    | 5.71                                     | 4.70E-02            |
| AI662270 | 100043636 | 255.40                                   | 117.69                                   | 2.57E-03            |
| Deun1d4  | 100737    | 5.92                                     | 2.72                                     | 1.81E-02            |
| Mocos    | 68591     | 5.89                                     | 2.70                                     | 1.83E-02            |
| Macrodl  | 107227    | 10.31                                    | 4.71                                     | 4.01E-02            |

| Symbol    | EntrezID  | <i>Xbp1</i> <sup>+/+</sup><br>expression | <i>Xbp1</i> <sup>fl/fl</sup><br>expression | Adjusted<br>P.Value |
|-----------|-----------|------------------------------------------|--------------------------------------------|---------------------|
| Slc1a5    | 20514     | 67.25                                    | 30.66                                      | 6.36E-03            |
| Srp54c    | 100101806 | 40.01                                    | 18.23                                      | 1.26E-02            |
| Zscan26   | 432731    | 37.78                                    | 17.21                                      | 1.04E-02            |
| Plin3     | 66905     | 37.48                                    | 17.04                                      | 9.83E-03            |
| Yipf2     | 74766     | 41.93                                    | 19.01                                      | 1.04E-02            |
| Pou2f2    | 18987     | 22.29                                    | 10.11                                      | 1.68E-02            |
| Kif16b    | 16558     | 17.16                                    | 7.78                                       | 4.11E-02            |
| Cede134   | 76457     | 37.80                                    | 17.10                                      | 8.80E-03            |
| Tasp1     | 75812     | 4.60                                     | 2.08                                       | 4.70E-02            |
| Kbtbd11   | 74901     | 16.06                                    | 7.25                                       | 1.07E-02            |
| Cbx4      | 12418     | 35.52                                    | 15.98                                      | 2.78E-03            |
| Gmnds     | 218138    | 25.85                                    | 11.61                                      | 1.91E-02            |
| Srm       | 20810     | 74.50                                    | 33.43                                      | 8.55E-03            |
| Chpf2     | 100910    | 39.98                                    | 17.92                                      | 3.85E-03            |
| Tlr7      | 170743    | 9.53                                     | 4.27                                       | 4.08E-02            |
| Manf      | 74840     | 356.19                                   | 159.47                                     | 6.63E-03            |
| Arf4      | 11843     | 323.81                                   | 144.88                                     | 2.08E-03            |
| Tnfrsf10  | 22035     | 16.30                                    | 7.29                                       | 1.59E-02            |
| Stu3b     | 68292     | 138.75                                   | 61.90                                      | 3.65E-03            |
| March9    | 216438    | 8.57                                     | 3.82                                       | 4.66E-02            |
| Cxcr3     | 12766     | 25.59                                    | 11.40                                      | 3.20E-02            |
| Cede127   | 67433     | 9.61                                     | 4.27                                       | 5.67E-03            |
| Ubxn4     | 67812     | 89.79                                    | 39.91                                      | 9.23E-03            |
| Qrt1      | 60507     | 11.16                                    | 4.95                                       | 3.59E-02            |
| Tmed2     | 56334     | 155.55                                   | 68.91                                      | 6.76E-03            |
| Mt1       | 17748     | 310.35                                   | 137.20                                     | 4.09E-02            |
| Rrbp1     | 81910     | 151.59                                   | 67.00                                      | 1.82E-02            |
| Daglb     | 231871    | 6.01                                     | 2.66                                       | 2.76E-02            |
| Herpud1   | 64209     | 839.49                                   | 369.64                                     | 5.47E-03            |
| Snn       | 20621     | 48.61                                    | 21.39                                      | 7.43E-03            |
| Ddrgk1    | 77006     | 128.05                                   | 56.34                                      | 1.02E-02            |
| Tbcd1d15  | 66687     | 33.11                                    | 14.57                                      | 8.17E-03            |
| Glee      | 93683     | 6.74                                     | 2.96                                       | 1.86E-02            |
| Slc52a2   | 52710     | 12.83                                    | 5.64                                       | 3.35E-02            |
| Atraid    | 381629    | 83.07                                    | 36.39                                      | 1.45E-02            |
| Bbs2      | 67378     | 6.45                                     | 2.82                                       | 2.68E-02            |
| Suox      | 211389    | 4.31                                     | 1.89                                       | 4.45E-02            |
| Prg2      | 19074     | 1763.33                                  | 767.31                                     | 2.08E-02            |
| Srprb     | 20818     | 88.68                                    | 38.59                                      | 2.68E-03            |
| Alg11     | 207958    | 14.17                                    | 6.16                                       | 6.26E-03            |
| Zswim1    | 71971     | 9.93                                     | 4.31                                       | 1.65E-02            |
| Kenmb4    | 58802     | 34.29                                    | 14.85                                      | 3.59E-02            |
| Zbtb42    | 382639    | 11.18                                    | 4.83                                       | 1.97E-02            |
| Lamc1     | 226519    | 17.83                                    | 7.70                                       | 5.88E-03            |
| Ptpre     | 19267     | 18.35                                    | 7.91                                       | 8.45E-03            |
| Irak1     | 16179     | 77.09                                    | 33.19                                      | 2.57E-03            |
| Abcb6     | 74104     | 11.46                                    | 4.92                                       | 1.58E-02            |
| Smco4     | 170748    | 14.80                                    | 6.34                                       | 3.99E-02            |
| Rapgef3   | 223864    | 39.06                                    | 16.73                                      | 2.64E-03            |
| Pomgnt1   | 68273     | 26.01                                    | 11.13                                      | 3.40E-03            |
| Serpina3f | 238393    | 65.98                                    | 28.18                                      | 3.20E-02            |
| Bag3      | 29810     | 5.30                                     | 2.26                                       | 1.72E-02            |
| Gorasp1   | 74498     | 9.34                                     | 3.99                                       | 8.02E-03            |
| Ddost     | 13200     | 388.23                                   | 165.42                                     | 1.87E-03            |
| Adk       | 11534     | 115.00                                   | 48.97                                      | 1.96E-03            |
| C2cd2l    | 71764     | 15.87                                    | 6.76                                       | 8.17E-03            |
| BC003331  | 226499    | 59.38                                    | 25.18                                      | 1.41E-02            |
| Spes3     | 76687     | 311.81                                   | 132.03                                     | 2.23E-03            |
| Cnpy3     | 72029     | 20.42                                    | 8.63                                       | 1.02E-02            |
| Rusc1     | 72296     | 20.08                                    | 8.47                                       | 1.09E-02            |
| Fam212a   | 68176     | 13.44                                    | 5.66                                       | 3.55E-02            |
| Wbp5      | 22381     | 93.76                                    | 39.39                                      | 2.78E-03            |
| Tulp3     | 22158     | 7.23                                     | 3.04                                       | 2.58E-02            |
| Elmod2    | 244548    | 12.43                                    | 5.21                                       | 9.06E-03            |
| Ebi3      | 50498     | 20.69                                    | 8.67                                       | 1.79E-02            |
| Slc17a9   | 228993    | 22.53                                    | 9.43                                       | 1.37E-02            |
| Etnk1     | 75320     | 175.35                                   | 73.36                                      | 1.00E-02            |
| Cop2      | 56358     | 29.67                                    | 12.41                                      | 2.68E-02            |
| Spes2     | 66624     | 310.13                                   | 129.62                                     | 1.70E-03            |
| Abca2     | 11305     | 4.26                                     | 1.78                                       | 1.79E-02            |
| Tor4a     | 227612    | 35.50                                    | 14.78                                      | 2.86E-03            |
| Nab2      | 17937     | 6.96                                     | 2.90                                       | 2.65E-02            |
| Cep44     | 382010    | 18.51                                    | 7.70                                       | 3.48E-02            |

| Symbol        | EntrezID  | <i>Xbp1</i> <sup>+/+</sup><br>expression | <i>Xbp1</i> <sup>fl/fl</sup><br>expression | Adjusted<br>P.Value |
|---------------|-----------|------------------------------------------|--------------------------------------------|---------------------|
| Cnpy2         | 56530     | 171.16                                   | 71.15                                      | 5.84E-03            |
| Ide           | 15925     | 46.67                                    | 19.37                                      | 2.93E-03            |
| Idua          | 15932     | 14.91                                    | 6.18                                       | 5.14E-03            |
| Pkd2l2        | 53871     | 16.42                                    | 6.78                                       | 6.15E-03            |
| 4933421010Rik | 100504166 | 15.40                                    | 6.36                                       | 5.86E-03            |
| Gm21540       | 100862175 | 85.13                                    | 35.14                                      | 1.37E-02            |
| Dusp14        | 56405     | 13.19                                    | 5.44                                       | 3.72E-02            |
| Ctage5        | 217615    | 48.35                                    | 19.94                                      | 7.77E-03            |
| Slc33a1       | 11416     | 82.56                                    | 34.01                                      | 2.10E-03            |
| Nuggc         | 100503545 | 43.96                                    | 18.11                                      | 8.45E-03            |
| Rnf185        | 193670    | 29.19                                    | 12.01                                      | 2.78E-03            |
| Ppapdc2       | 74411     | 9.11                                     | 3.74                                       | 1.65E-02            |
| Ick           | 56542     | 5.51                                     | 2.26                                       | 5.73E-03            |
| Ralgds        | 19730     | 31.85                                    | 13.04                                      | 3.24E-03            |
| Vimp          | 109815    | 141.22                                   | 57.80                                      | 2.86E-03            |
| Grn           | 14824     | 256.74                                   | 104.94                                     | 2.06E-03            |
| Odc1          | 18263     | 74.45                                    | 30.35                                      | 8.80E-03            |
| Gca           | 227960    | 19.38                                    | 7.86                                       | 7.12E-03            |
| Rilpl1        | 75695     | 9.48                                     | 3.84                                       | 8.80E-03            |
| Fpgs          | 14287     | 15.27                                    | 6.13                                       | 1.02E-02            |
| Clptm11       | 218335    | 427.04                                   | 171.22                                     | 1.92E-03            |
| Gnptg         | 214505    | 29.64                                    | 11.86                                      | 1.06E-02            |
| Aldh6a1       | 104776    | 8.58                                     | 3.43                                       | 1.29E-02            |
| Wnt10a        | 22409     | 32.34                                    | 12.92                                      | 1.02E-02            |
| Kdm6b         | 216850    | 6.19                                     | 2.47                                       | 1.02E-02            |
| Wdyhv1        | 76773     | 17.39                                    | 6.94                                       | 1.51E-02            |
| Pla2g6        | 53357     | 15.94                                    | 6.36                                       | 2.78E-03            |
| Mfsd11        | 69900     | 14.42                                    | 5.75                                       | 3.90E-03            |
| Harbil        | 241547    | 11.52                                    | 4.59                                       | 1.33E-02            |
| Scimp         | 327957    | 17.80                                    | 7.08                                       | 3.11E-02            |
| Gstt3         | 103140    | 8.09                                     | 3.22                                       | 3.13E-02            |
| Ptpn21        | 24000     | 6.81                                     | 2.71                                       | 1.53E-02            |
| Nxn           | 18230     | 5.98                                     | 2.38                                       | 2.46E-02            |
| Pycr2         | 69051     | 28.34                                    | 11.25                                      | 5.67E-03            |
| Slc39a7       | 14977     | 179.38                                   | 70.95                                      | 1.51E-03            |
| Prdx4         | 53381     | 541.95                                   | 214.24                                     | 1.76E-03            |
| Intu          | 380614    | 5.10                                     | 2.01                                       | 3.48E-02            |
| Clec2i        | 93675     | 23.34                                    | 9.18                                       | 2.18E-02            |
| Mbnl2         | 105559    | 40.98                                    | 16.12                                      | 3.30E-03            |
| Crelid2       | 76737     | 703.79                                   | 276.37                                     | 3.24E-03            |
| Coq10b        | 67876     | 10.25                                    | 4.02                                       | 2.05E-02            |
| Tmem39a       | 67846     | 39.44                                    | 15.42                                      | 2.10E-03            |
| BC004004      | 80748     | 71.51                                    | 27.84                                      | 3.30E-03            |
| Lrrc16a       | 68732     | 4.56                                     | 1.76                                       | 3.20E-02            |
| Dhdds         | 67422     | 50.37                                    | 19.47                                      | 3.97E-03            |
| Alg1          | 208211    | 23.75                                    | 9.18                                       | 1.36E-02            |
| Uso1          | 56041     | 163.92                                   | 63.30                                      | 8.68E-03            |
| Evi2a         | 14017     | 94.12                                    | 36.26                                      | 2.82E-03            |
| Blvra         | 109778    | 20.13                                    | 7.70                                       | 5.10E-03            |
| Spns3         | 77577     | 33.48                                    | 12.78                                      | 6.15E-03            |
| Serp1         | 28146     | 1511.28                                  | 574.71                                     | 2.85E-03            |
| Srms          | 20811     | 10.03                                    | 3.79                                       | 1.84E-02            |
| P4hb          | 18453     | 411.42                                   | 155.28                                     | 1.84E-03            |
| Sec63         | 140740    | 66.09                                    | 24.76                                      | 2.55E-03            |
| Alg2          | 56737     | 47.27                                    | 17.70                                      | 3.28E-03            |
| B3galt4       | 54218     | 13.30                                    | 4.95                                       | 1.58E-02            |
| Atg13         | 51897     | 31.87                                    | 11.85                                      | 1.86E-03            |
| Sgsm3         | 105835    | 6.89                                     | 2.56                                       | 7.11E-03            |
| Vmac          | 106639    | 18.15                                    | 6.69                                       | 1.93E-02            |
| Gbp5          | 229898    | 14.70                                    | 5.41                                       | 6.39E-03            |
| Parvb         | 170736    | 4.25                                     | 1.57                                       | 9.56E-03            |
| Txlnb         | 378431    | 9.70                                     | 3.55                                       | 3.06E-02            |
| Spes2-ps      | 668896    | 51.20                                    | 18.72                                      | 5.85E-03            |
| Tada2b        | 231151    | 17.35                                    | 6.33                                       | 3.67E-03            |
| Hdlbp         | 110611    | 262.25                                   | 95.54                                      | 1.03E-02            |
| Nedd4         | 17999     | 30.03                                    | 10.91                                      | 6.15E-03            |
| Eif2ak3       | 13666     | 56.24                                    | 20.24                                      | 3.07E-03            |
| Gm10177       | 100042561 | 236.46                                   | 85.07                                      | 1.06E-02            |
| Slc31a1       | 20529     | 27.05                                    | 9.70                                       | 1.65E-03            |
| Tmem241       | 338363    | 4.47                                     | 1.60                                       | 3.51E-02            |
| Rpn2          | 20014     | 306.96                                   | 109.61                                     | 9.88E-04            |
| Scfd2         | 212986    | 8.94                                     | 3.18                                       | 1.97E-02            |
| Tmem170       | 66817     | 16.37                                    | 5.81                                       | 2.55E-02            |

| Symbol        | EntrezID  | <i>Xbp1</i> <sup>+/+</sup><br>expression | <i>Xbp1</i> <sup>fl/fl</sup><br>expression | Adjusted<br>P.Value |
|---------------|-----------|------------------------------------------|--------------------------------------------|---------------------|
| Ctsh          | 13036     | 58.05                                    | 20.61                                      | 7.69E-03            |
| Ank           | 11732     | 9.52                                     | 3.37                                       | 7.45E-03            |
| Sec23b        | 27054     | 76.77                                    | 27.18                                      | 1.40E-03            |
| Derl3         | 70377     | 627.29                                   | 221.14                                     | 2.19E-03            |
| E330020D12Rik | 626058    | 5.59                                     | 1.96                                       | 4.70E-02            |
| Saraf         | 67887     | 192.06                                   | 67.41                                      | 2.04E-03            |
| Zfp324        | 243834    | 7.19                                     | 2.52                                       | 2.68E-02            |
| Rab3a         | 19339     | 11.09                                    | 3.88                                       | 9.48E-03            |
| Mgat2         | 217664    | 105.71                                   | 36.88                                      | 1.10E-03            |
| Dpagt1        | 13478     | 46.85                                    | 16.31                                      | 3.97E-03            |
| Gpr65         | 14744     | 28.75                                    | 10.01                                      | 1.65E-03            |
| Mcf2          | 193813    | 56.92                                    | 19.74                                      | 1.25E-03            |
| Ly6c1         | 17067     | 35.08                                    | 12.11                                      | 1.51E-02            |
| Preb          | 50907     | 40.13                                    | 13.83                                      | 1.10E-03            |
| Slc30a5       | 69048     | 68.20                                    | 23.45                                      | 1.06E-03            |
| Tmem208       | 66320     | 67.18                                    | 23.09                                      | 1.17E-02            |
| BC061194      | 381350    | 17.33                                    | 5.94                                       | 1.01E-02            |
| Zscan22       | 232878    | 8.22                                     | 2.81                                       | 3.42E-02            |
| Six5          | 20475     | 5.27                                     | 1.80                                       | 1.02E-02            |
| Kif19a        | 286942    | 5.36                                     | 1.82                                       | 2.57E-02            |
| Stim2         | 116873    | 7.71                                     | 2.62                                       | 5.38E-03            |
| Sdf2l1        | 64136     | 363.52                                   | 123.31                                     | 2.91E-03            |
| Ufn1          | 67490     | 38.00                                    | 12.88                                      | 3.02E-03            |
| Peg13         | 353342    | 27.71                                    | 9.32                                       | 1.80E-03            |
| Ssr3          | 67437     | 408.01                                   | 137.26                                     | 2.68E-03            |
| Tes           | 21753     | 12.94                                    | 4.35                                       | 4.86E-03            |
| Leprot        | 230514    | 36.42                                    | 12.18                                      | 2.03E-03            |
| Gmppb         | 331026    | 44.28                                    | 14.81                                      | 2.06E-03            |
| Laptn5        | 16792     | 269.77                                   | 89.94                                      | 1.06E-02            |
| Nans          | 94181     | 55.81                                    | 18.54                                      | 2.42E-03            |
| Entpd7        | 93685     | 6.37                                     | 2.10                                       | 3.88E-03            |
| Cd200         | 17470     | 20.44                                    | 6.72                                       | 3.51E-03            |
| Slpi          | 20568     | 6190.02                                  | 2035.66                                    | 2.42E-03            |
| Ache          | 11423     | 8.33                                     | 2.73                                       | 1.68E-02            |
| D8Erd82e      | 244418    | 5.24                                     | 1.72                                       | 1.32E-02            |
| H2-T23        | 15040     | 468.11                                   | 152.40                                     | 9.51E-04            |
| Att6b         | 12915     | 83.08                                    | 27.02                                      | 9.38E-04            |
| Gpr108        | 78308     | 55.21                                    | 17.88                                      | 3.02E-03            |
| Eml6          | 237711    | 7.98                                     | 2.58                                       | 5.05E-03            |
| Zfp963        | 620419    | 7.44                                     | 2.40                                       | 1.42E-02            |
| H2-T24        | 15042     | 75.56                                    | 24.24                                      | 2.42E-03            |
| Ticam1        | 106759    | 25.52                                    | 8.12                                       | 1.96E-03            |
| Pigg          | 433931    | 8.96                                     | 2.84                                       | 1.01E-02            |
| Lpp           | 210126    | 7.46                                     | 2.36                                       | 8.80E-03            |
| Spr           | 67398     | 235.11                                   | 74.21                                      | 9.05E-04            |
| Tmem248       | 71667     | 97.02                                    | 30.58                                      | 9.66E-04            |
| Pbxip1        | 229534    | 31.22                                    | 9.82                                       | 1.85E-03            |
| Rhpn2         | 52428     | 11.82                                    | 3.71                                       | 4.80E-03            |
| Tmem214       | 68796     | 115.83                                   | 36.29                                      | 6.58E-04            |
| Yif1a         | 68090     | 49.66                                    | 15.55                                      | 7.20E-03            |
| Slc17a5       | 235504    | 25.42                                    | 7.92                                       | 1.10E-03            |
| Kcnmb4os2     | 100504412 | 39.90                                    | 12.42                                      | 2.28E-02            |
| Thbd          | 21824     | 35.52                                    | 10.96                                      | 3.74E-03            |
| Tspyl2        | 52808     | 16.18                                    | 4.99                                       | 2.57E-03            |
| Nbas          | 71169     | 33.50                                    | 10.31                                      | 2.04E-03            |
| Dnajc10       | 66861     | 51.27                                    | 15.76                                      | 9.38E-04            |
| Fut4          | 14345     | 22.88                                    | 7.03                                       | 3.24E-03            |
| Abhd4         | 105501    | 14.17                                    | 4.34                                       | 2.92E-03            |
| Man2b2        | 17160     | 61.50                                    | 18.73                                      | 9.38E-04            |
| Tram1         | 72265     | 312.70                                   | 94.66                                      | 7.98E-04            |
| B3gnt8        | 232984    | 4.84                                     | 1.46                                       | 1.41E-02            |
| Sec61a1       | 53421     | 407.37                                   | 123.00                                     | 6.33E-04            |
| Cyb561d2      | 56368     | 13.35                                    | 4.03                                       | 1.82E-02            |
| Slc30a7       | 66500     | 24.46                                    | 7.37                                       | 9.38E-04            |
| H6pd          | 100198    | 10.87                                    | 3.28                                       | 4.23E-03            |
| Tapbp         | 21356     | 201.35                                   | 60.34                                      | 9.43E-04            |
| Paip2b        | 232164    | 30.56                                    | 9.13                                       | 3.07E-03            |
| Ly6c2         | 100041546 | 2358.95                                  | 703.27                                     | 1.31E-03            |
| Klhl21        | 242785    | 8.17                                     | 2.43                                       | 2.19E-03            |
| Tmem150a      | 232086    | 16.83                                    | 4.99                                       | 1.14E-02            |
| Kctd14        | 233529    | 8.09                                     | 2.40                                       | 2.98E-03            |
| Aldh9a1       | 56752     | 66.74                                    | 19.57                                      | 6.38E-04            |
| Ttc13         | 234875    | 42.77                                    | 12.54                                      | 9.30E-04            |

| Symbol        | EntrezID  | <i>Xbp1</i> <sup>+/+</sup><br>expression | <i>Xbp1</i> <sup>fl/fl</sup><br>expression | Adjusted<br>P.Value |
|---------------|-----------|------------------------------------------|--------------------------------------------|---------------------|
| Swsap1        | 66962     | 9.96                                     | 2.89                                       | 8.80E-03            |
| Edem2         | 108687    | 654.37                                   | 188.27                                     | 4.24E-04            |
| Sema6d        | 214968    | 12.27                                    | 3.52                                       | 9.39E-04            |
| Cnm2          | 94219     | 5.01                                     | 1.42                                       | 6.95E-03            |
| Napsa         | 16541     | 127.81                                   | 36.17                                      | 9.38E-04            |
| Tex2          | 21763     | 11.77                                    | 3.32                                       | 2.98E-03            |
| Kcnk5         | 16529     | 9.57                                     | 2.69                                       | 1.65E-03            |
| Wrb           | 71446     | 4.22                                     | 1.18                                       | 1.37E-02            |
| Bet1          | 12068     | 78.03                                    | 21.83                                      | 9.38E-04            |
| Ergic3        | 66366     | 175.91                                   | 49.19                                      | 1.69E-03            |
| Serpinc9      | 20723     | 9.60                                     | 2.68                                       | 3.53E-03            |
| Bckdk         | 12041     | 71.56                                    | 19.96                                      | 1.96E-03            |
| Matn2         | 17181     | 6.07                                     | 1.69                                       | 1.23E-02            |
| Mzb1          | 69816     | 2758.49                                  | 766.88                                     | 9.38E-04            |
| Ssr4          | 20832     | 1205.64                                  | 333.61                                     | 3.75E-04            |
| Selm          | 114679    | 63.18                                    | 17.40                                      | 6.15E-03            |
| Httip2        | 53415     | 60.63                                    | 16.56                                      | 1.70E-03            |
| Arfgap3       | 66251     | 79.64                                    | 21.72                                      | 1.10E-03            |
| Rpl36al       | 66483     | 519.30                                   | 141.58                                     | 2.10E-03            |
| Rab20         | 19332     | 11.35                                    | 3.06                                       | 3.15E-02            |
| Ripply3       | 170765    | 5.14                                     | 1.38                                       | 1.84E-02            |
| Emilin1       | 100952    | 6.11                                     | 1.64                                       | 9.89E-03            |
| Spns2         | 216892    | 4.39                                     | 1.18                                       | 6.27E-03            |
| Haao          | 107766    | 11.87                                    | 3.17                                       | 6.78E-03            |
| Slamf9        | 98365     | 41.20                                    | 10.90                                      | 2.04E-03            |
| Armex3        | 71703     | 13.32                                    | 3.52                                       | 1.40E-03            |
| Sec61g        | 20335     | 6.82                                     | 1.80                                       | 4.11E-02            |
| Vps37c        | 107305    | 20.19                                    | 5.30                                       | 1.25E-03            |
| Gylt1b        | 228366    | 5.66                                     | 1.47                                       | 6.94E-03            |
| 4930481A15Rik | 74931     | 7.26                                     | 1.88                                       | 5.86E-03            |
| Uba5          | 66663     | 91.26                                    | 23.55                                      | 7.48E-04            |
| Prfl          | 18646     | 6.93                                     | 1.79                                       | 4.39E-02            |
| Insig1        | 231070    | 32.32                                    | 8.22                                       | 1.55E-03            |
| Lamp1         | 16783     | 182.64                                   | 46.43                                      | 3.24E-03            |
| Kdml1b        | 218214    | 11.26                                    | 2.85                                       | 1.72E-03            |
| Tmem238       | 664968    | 6.70                                     | 1.68                                       | 2.08E-02            |
| Mturm         | 68235     | 6.68                                     | 1.68                                       | 1.52E-02            |
| Chid1         | 68038     | 34.03                                    | 8.45                                       | 1.10E-03            |
| Plbd2         | 71772     | 46.48                                    | 11.53                                      | 7.98E-04            |
| Anxa9         | 71790     | 5.46                                     | 1.35                                       | 1.70E-02            |
| Fam134c       | 67998     | 36.49                                    | 8.95                                       | 9.43E-04            |
| Tspan17       | 74257     | 5.40                                     | 1.32                                       | 1.70E-02            |
| Nfx11         | 100978    | 19.83                                    | 4.82                                       | 2.63E-03            |
| Sec24d        | 69608     | 96.44                                    | 23.42                                      | 7.79E-04            |
| Kank2         | 235041    | 4.33                                     | 1.05                                       | 2.19E-03            |
| Impdh1        | 23917     | 39.34                                    | 9.53                                       | 6.33E-04            |
| Creb3l1       | 26427     | 7.96                                     | 1.91                                       | 1.02E-02            |
| Lgals3bp      | 19039     | 22.25                                    | 5.30                                       | 1.10E-02            |
| Rrad          | 56437     | 19.55                                    | 4.63                                       | 8.75E-03            |
| Cst3          | 13010     | 552.31                                   | 130.20                                     | 9.38E-04            |
| Thns12        | 232078    | 8.83                                     | 2.06                                       | 2.49E-02            |
| Gnaz          | 14687     | 8.38                                     | 1.95                                       | 4.83E-02            |
| Trabd         | 67976     | 113.83                                   | 26.25                                      | 3.59E-04            |
| Magt1         | 67075     | 92.40                                    | 21.14                                      | 5.10E-04            |
| Gm19799       | 100503618 | 23.12                                    | 5.27                                       | 3.35E-02            |
| Fied          | 231630    | 21.13                                    | 4.82                                       | 1.10E-03            |
| Btla          | 208154    | 71.72                                    | 16.21                                      | 6.33E-04            |
| Kdelr3        | 105785    | 17.66                                    | 3.99                                       | 1.70E-03            |
| F8a           | 14070     | 12.38                                    | 2.80                                       | 4.40E-03            |
| Dnajc12       | 30045     | 5.55                                     | 1.24                                       | 1.56E-02            |
| Dnajb11       | 67838     | 207.65                                   | 46.20                                      | 3.59E-04            |
| Mlec          | 109154    | 139.24                                   | 30.90                                      | 4.97E-04            |
| Peer          | 111175    | 24.50                                    | 5.38                                       | 4.64E-03            |
| Sec61b        | 66212     | 233.71                                   | 51.26                                      | 1.25E-03            |
| Dpp7          | 83768     | 10.76                                    | 2.35                                       | 2.48E-03            |
| Slc2a6        | 227659    | 8.86                                     | 1.92                                       | 6.15E-03            |
| Pdk2          | 18604     | 12.82                                    | 2.76                                       | 8.25E-03            |
| Cdl180        | 17079     | 48.86                                    | 10.41                                      | 1.76E-03            |
| Vat1          | 26949     | 28.05                                    | 5.92                                       | 2.68E-03            |
| Cyslr2        | 70086     | 8.97                                     | 1.88                                       | 5.56E-03            |
| Hspa13        | 110920    | 78.90                                    | 16.54                                      | 3.59E-04            |
| Sid2          | 214597    | 82.89                                    | 17.36                                      | 3.59E-04            |
| Rab39b        | 67790     | 8.46                                     | 1.77                                       | 4.64E-03            |

| Symbol       | EntrezID  | <i>Xbp1</i> <sup>+/+</sup><br>expression | <i>Xbp1</i> <sup>n/n</sup><br>expression | Adjusted<br>P.Value |
|--------------|-----------|------------------------------------------|------------------------------------------|---------------------|
| Gm2a         | 14667     | 52.69                                    | 10.88                                    | 1.96E-03            |
| Rab6b        | 270192    | 4.98                                     | 1.02                                     | 1.50E-02            |
| Qpct1        | 67369     | 49.28                                    | 10.04                                    | 7.98E-04            |
| Qsox2        | 227638    | 13.67                                    | 2.72                                     | 1.43E-03            |
| Rab3d        | 19340     | 40.24                                    | 7.95                                     | 3.65E-04            |
| Dusp23       | 68440     | 5.41                                     | 1.07                                     | 1.06E-02            |
| Ero1lb       | 67475     | 87.39                                    | 17.17                                    | 3.59E-04            |
| Clec2g       | 70809     | 33.72                                    | 6.60                                     | 7.98E-04            |
| Cped1        | 214642    | 5.26                                     | 1.02                                     | 1.41E-02            |
| Slc35f5      | 74150     | 13.93                                    | 2.68                                     | 1.06E-03            |
| Adss1l       | 11565     | 60.28                                    | 11.59                                    | 1.84E-03            |
| Retsat       | 67442     | 9.72                                     | 1.85                                     | 2.10E-03            |
| Kcnab2       | 16498     | 54.79                                    | 10.42                                    | 3.59E-04            |
| Camk2a       | 12322     | 8.35                                     | 1.57                                     | 2.19E-03            |
| Cib2         | 56506     | 37.51                                    | 7.05                                     | 2.74E-03            |
| Bloc1s1      | 14533     | 43.71                                    | 7.94                                     | 1.06E-02            |
| Plexd2       | 433022    | 9.66                                     | 1.73                                     | 4.88E-03            |
| C1qtnf1      | 56745     | 10.90                                    | 1.91                                     | 1.76E-03            |
| Hyou1        | 12282     | 298.88                                   | 52.10                                    | 6.38E-04            |
| Hvcn1        | 74096     | 140.62                                   | 22.26                                    | 3.59E-04            |
| Tex264       | 21767     | 32.86                                    | 5.15                                     | 9.45E-04            |
| Isg20        | 57444     | 124.89                                   | 19.55                                    | 9.38E-04            |
| Cyp4f18      | 72054     | 74.74                                    | 11.62                                    | 7.43E-03            |
| Rpn1         | 103963    | 285.80                                   | 44.00                                    | 1.32E-04            |
| Hgsnat       | 52120     | 17.35                                    | 2.66                                     | 9.43E-04            |
| Smim14       | 68552     | 24.61                                    | 3.65                                     | 5.02E-03            |
| Nucb1        | 18220     | 529.87                                   | 77.53                                    | 1.16E-04            |
| Armxc2       | 67416     | 11.66                                    | 1.69                                     | 3.59E-04            |
| AW011738     | 100382    | 8.82                                     | 1.28                                     | 1.40E-03            |
| Fgl2         | 14190     | 29.24                                    | 4.20                                     | 1.33E-03            |
| Ppapde1b     | 71910     | 148.04                                   | 20.29                                    | 3.59E-04            |
| Dnajc3       | 100037258 | 249.63                                   | 33.40                                    | 3.59E-04            |
| Cacna1s      | 12292     | 19.02                                    | 2.45                                     | 9.56E-04            |
| Mrgpre       | 244238    | 9.14                                     | 1.15                                     | 1.40E-03            |
| Lag3         | 16768     | 49.54                                    | 6.02                                     | 2.92E-03            |
| Erp44        | 76299     | 138.12                                   | 15.93                                    | 7.04E-05            |
| Atp9a        | 11981     | 26.13                                    | 2.94                                     | 1.25E-03            |
| Wipf3        | 330319    | 8.10                                     | 0.87                                     | 2.85E-02            |
| Gabra4       | 14397     | 7.60                                     | 0.79                                     | 5.38E-03            |
| Serpini1     | 20713     | 17.23                                    | 1.67                                     | 9.38E-04            |
| Fcrla        | 98752     | 338.44                                   | 31.79                                    | 3.59E-04            |
| Itgb2        | 16414     | 157.17                                   | 14.19                                    | 1.33E-03            |
| Nucb2        | 53322     | 27.22                                    | 2.44                                     | 9.38E-04            |
| Myo1h        | 231646    | 6.36                                     | 0.56                                     | 7.64E-03            |
| Bhlha15      | 17341     | 100.10                                   | 8.62                                     | 5.24E-05            |
| Zfp9         | 22750     | 8.80                                     | 0.67                                     | 2.19E-03            |
| Arhgef10     | 234094    | 5.90                                     | 0.42                                     | 9.38E-04            |
| Dnajb9       | 27362     | 243.79                                   | 15.56                                    | 4.80E-05            |
| Atat1        | 73242     | 52.85                                    | 3.23                                     | 7.04E-05            |
| Guca1a       | 14913     | 4.00                                     | 0.23                                     | 2.26E-02            |
| Fkbp11       | 66120     | 121.01                                   | 6.50                                     | 3.59E-04            |
| Gpx3         | 14778     | 13.15                                    | 0.66                                     | 1.90E-03            |
| Kcnk6        | 52150     | 20.53                                    | 1.01                                     | 4.17E-04            |
| Gm6568       | 625253    | 63.56                                    | 2.94                                     | 3.59E-04            |
| Ptges        | 64292     | 4.61                                     | 0.21                                     | 3.02E-03            |
| Aldh1a2      | 19378     | 5.43                                     | 0.19                                     | 6.39E-03            |
| LOC100504608 | 100504608 | 14.75                                    | 0.50                                     | 2.19E-03            |
| Hid1         | 217310    | 91.74                                    | 2.04                                     | 4.45E-05            |
